# Supplementary material
Source: publisher figshare collection journal article supplement (https://acs.figshare.com/ndownloader/files/5140870)

# Studies toward the Pharmacophore of Salvinorin A, a Potent $\kappa$ Opioid Receptor Agonist

*Thomas A. Munro, Mark A. Rizzacasa, Bryan L. Roth, Beth A. Toth, and Feng Yan*

## Supporting Information

### Table of Contents

|                                                         | Experimental | NMR spectra |
|---------------------------------------------------------|--------------|-------------|
| Salvinorin A ( <b>1</b> )                               | S2           |             |
| 8- <i>epi</i> -Salvinorin A (8- <i>epi</i> - <b>1</b> ) | S2           | S9          |
| Salvinorin B formate ( <b>3</b> )                       | S3           | S10         |
| Salvinorin C ( <b>6</b> )                               |              | S11         |
| (4 <i>R</i> )-3,4-Dihydrosalvinorin E ( <b>8</b> )      |              | S12         |
| (4 <i>R</i> )-3,4-Dihydrosalvinorin C ( <b>9</b> )      |              | S13         |
| 13,14,15,16-Tetrahydrosalvinorin A ( <b>10</b> )        | S3           | S14         |
| Salvinorin A lactol ( <b>11</b> )                       | S4           | S15         |
| 17-Deoxysalvinorin A ( <b>12</b> )                      | S4           | S16         |
| 8,17-Didehydro-17-deoxysalvinorin A ( <b>13</b> )       | S4           | S17         |
| <i>O</i> -Demethyl-18-deoxysalvinorin A ( <b>15</b> )   | S5           | S18         |
| 1-Deoxysalvinorin A ( <b>18</b> )                       | S6           | S19         |
| IUPAC/NIST Chemical Identifiers (INChIs)                | S7           |             |
| References                                              | S7           |             |

## Experimental Section.

Optical rotations: JASCO DIP-1000 digital polarimeter. IR spectra: Bio-Rad FTS 165 FT-IR spectrophotometer.  $^1\text{H}$  NMR (400 MHz) and  $^{13}\text{C}$  NMR (100 MHz): Varian Inova 400 and Unity Plus 400. HRESIMS: Bruker 4.7T BiOAPEX FTMS. TLC: Merck silica gel 60 F<sub>254</sub> plates, visualized with phosphomolybdic acid in EtOH unless otherwise indicated ( $hR_f = R_f \times 100$ ). HPLC: Spherex 5  $\mu\text{m}$  silica column (250  $\times$  10 mm), flow rate 2 mL min<sup>-1</sup>. Flash column chromatography (FCC): 6 mL of Scharlau silica gel 60 (particle size 0.04 – 0.06 mm). Commercial ethanethiol and DMPU (Aldrich, 98%) were stored over 4Å sieves. ‘Petrol’ refers to the fraction boiling at 40-60 °C. ‘Standard drying’ refers to drying over MgSO<sub>4</sub>, filtration and evaporation under reduced pressure.

**Radioligand Binding Assays.** Performed as previously detailed<sup>1-3</sup> using cloned receptors stably expressed in HEK 293 cells.  $\kappa$ : rat KORs with [ $^3\text{H}$ ]diprenorphine (50 Ci/mmol, PerkinElmer Inc) or [ $^3\text{H}$ ]U69,593 (41.4 Ci/mmol, PerkinElmer Inc) as radioligand.  $\delta$ : human DORs with [ $^3\text{H}$ ]DADLE {Enkephalin (2-D-Alanine-5-D-Leucine), [Tyrosyl-3,5- $^3\text{H}(\text{N})$ ]-} (51.5 Ci/mmol, PerkinElmer Inc) as radioligand.  $\mu$ : human MORs with [ $^3\text{H}$ ]diprenorphine as radioligand.  $K_i$  values were calculated using Prism 4.01 (GraphPad Software, Inc) as the mean  $\pm$ SEM of quadruplicate ( $n \geq 4$ ) determinations. Nonspecific binding was defined using 10  $\mu\text{M}$  naloxone.

**Calcium Flux Functional Assay.** Performed as previously detailed<sup>4,5</sup> using cloned rat KORs stably expressed in HEK 293 cells, cotransfected with the universal G protein G $\alpha_{16}$ . Ca<sup>2+</sup> mobilization was quantified using a 96-well FlexStationII with the calcium flux assay kit (Molecular Devices Corp, Sunnyvale, CA). EC<sub>50</sub> and  $E_{\text{max}}$  values were calculated using Prism 4.01 (GraphPad Software, Inc), as the mean  $\pm$ SEM of quadruplicate ( $n \geq 4$ ) determinations.

**Salvinorin A (1).**  $^1\text{H}$  NMR ( $\text{CDCl}_3$ ):  $\delta$  7.40 (1H, br s, H-16), 7.38 (1H, t,  $J = 1.8$  Hz, H-15), 6.37 (1H, dd,  $J = 1.8, 0.8$  Hz, H-14), 5.51 (1H, dd,  $J = 11.7, 5.3$  Hz, H-12), 5.13 (1H, m, H-2), 3.72 (3H, s, CO<sub>2</sub>CH<sub>3</sub>), 2.75 (1H, m, H-4), 2.49 (1H, dd,  $J = 13.5, 5.3$  Hz, H-11a), 2.29 (2H, m, H-3), 2.17 (1H, br s, H-10), 2.16 (3H, s, OCOCH<sub>3</sub>), 2.15 (1H, m, H-7a), 2.07 (1H, dd,  $J = 11.6, 3.1$  Hz, H-8), 1.78 (1H, m, H-6a), 1.63 (1H, m, H-7b), 1.57 (1H, m, H-6b), 1.57 (1H, ddd,  $J = 13.5, 11.7, 0.8$  Hz, H-11b), 1.44 (3H, s, H-20), 1.10 (3H, s, H-19).

**8-*epi*-Salvinorin A (8-*epi*-1).** Distilled DMPU (60 °C / 0.1 mmHg) was added to **1** (21.4 mg, 49.5  $\mu\text{mol}$ ) and NaHCO<sub>3</sub> (30.1 mg, 358  $\mu\text{mol}$ ), and stirred at 150 °C for 2 h. The resultant amber solution was cooled to rt, diluted in EtOAc, neutralized dropwise with 10% HCl, and washed (10% HCl  $\times$  4, then brine). Standard drying followed by FCC (30% - 50% EtOAc/petrol gradient) monitored by TLC ( $hR_f = 40$  (**1**), 50 (8-*epi*-**1**) in Et<sub>2</sub>O) gave 8-*epi*-**1** as a clear resin (10.8 mg, 51% (81% borsm));  $[\alpha]_D^{13} -53^\circ$  ( $c$  0.6, CHCl<sub>3</sub>); **FTIR (film)**: 2951, 1732, 1238, 1202, 1161, 876 cm<sup>-1</sup>;  $^1\text{H}$  NMR ( $\text{CDCl}_3$ ):  $\delta$  7.43 (1H, br s, H-16), 7.38 (1H, t,  $J = 1.7$  Hz, H-15), 6.37 (1H, d,  $J = 1.7$  Hz, H-14), 5.25 (1H, dd,  $J = 12.0, 2.2$  Hz, H-12), 5.09 (1H, m, H-2), 3.69 (3H, s, CO<sub>2</sub>CH<sub>3</sub>), 2.75 (1H, m, H-4), 2.45 (1H, dd,  $J = 5.0, 2.2$  Hz, H-8), 2.36 (1H, dd,  $J = 15.0, 2.2$  Hz, H-11a), 2.26 (2H, m, H-3), 2.24 (1H, br s, H-10), 2.17 (1H, m, H-7a), 2.15 (3H, s, OCOCH<sub>3</sub>), 2.00 (1H, td,  $J = 13.7, 3.9$  Hz, H-6a), 1.83 (1H, tdd,  $J = 14.2, 5.0, 3.9$  Hz, H-7b), 1.62 (3H, s, H-20), 1.54 (1H, dt,  $J = 13.7, 3.4$  Hz, H-6b), 1.50 (1H, dd,  $J = 15.0, 12.0$  Hz, H-11b), 1.07 (3H, s, H-19);

**<sup>13</sup>C NMR (CDCl<sub>3</sub>):** δ 202.3 (C, C-1), 173.4 (C, C-17), 171.8 (C, C-18), 169.8 (C, OCOCH<sub>3</sub>), 143.6 (CH, C-15), 139.7 (CH, C-16), 123.3 (C, C-13), 108.5 (CH, C-14), 75.2 (CH, C-2), 70.1 (CH, C-12), 64.1 (CH, C-10), 52.9 (CH, C-4), 51.8 (CH<sub>3</sub>, CO<sub>2</sub>CH<sub>3</sub>), 48.0 (CH<sub>2</sub>, C-11), 45.2 (CH, C-8), 42.2 (C, C-5), 34.7 (C, C-9), 33.9 (CH<sub>2</sub>, C-6), 30.6 (CH<sub>2</sub>, C-3), 24.6 (CH<sub>3</sub>, C-20), 20.5 (CH<sub>3</sub>, OCOCH<sub>3</sub>), 17.6 (CH<sub>2</sub>, C-7), 15.2 (CH<sub>3</sub>, C-19); **HRESIMS** [M + Na<sup>+</sup>] *m/z* 455.1683 (calcd for C<sub>23</sub>H<sub>28</sub>O<sub>8</sub>Na<sup>+</sup>, 455.1676).

**Salvinorin B formate (3).** A mixture of Ac<sub>2</sub>O (0.25 mL) and HCO<sub>2</sub>H (0.7 mL) was stirred at 45 °C for 40 minutes. Pyridine (1 mL) was added to **2** (18.0 mg, 46.1 μmol), warmed to 45 °C until fully dissolved, then cooled to 0 °C. The cooled anhydride mixture was added dropwise by pipette, causing violent bubbling. The solution was warmed to room temperature and stirred for 30 minutes, when TLC indicated completion (*hR<sub>f</sub>* = 85 (**3**), 65 (**2**) in 20% acetone/CH<sub>2</sub>Cl<sub>2</sub>, visualized in KMnO<sub>4</sub>). The reaction mixture was cooled to 0 °C, diluted dropwise with water, and extracted into EtOAc. The organic layer was washed (1% HCl, water, 5% NaHCO<sub>3</sub> and brine). Standard drying and FCC (2-4% MeOH/CH<sub>2</sub>Cl<sub>2</sub> gradient) gave **3** as a clear resin (13.8 mg, 72%); [α]<sub>D</sub><sup>26</sup> -54° (*c* 0.6, CH<sub>2</sub>Cl<sub>2</sub>); **FTIR (film):** 2952, 1726, 1278, 1163, 875 cm<sup>-1</sup>; **<sup>1</sup>H NMR (CDCl<sub>3</sub>):** δ 8.14 (1H, s, CHO), 7.41 (1H, br s, H-16), 7.40 (1H, t, *J* = 1.8 Hz, H-15), 6.38 (1H, dd, *J* = 1.8, 0.9 Hz, H-14), 5.54 (1H, dd, *J* = 11.7, 5.2 Hz, H-12), 5.26 (1H, m, H-2), 3.73 (3H, s, CO<sub>2</sub>CH<sub>3</sub>), 2.76 (1H, m, H-4), 2.51 (1H, dd, *J* = 13.5, 5.2 Hz, H-11a), 2.35 (2H, m, H-3), 2.18 (1H, d, *J* = 0.8 Hz, H-10), 2.17 (1H, m, H-7a), 2.08 (1H, dd, *J* = 11.5, 3.0 Hz, H-8), 1.80 (1H, m, H-6a), 1.67 (1H, m, H-7b), 1.58 (1H, ddd, *J* = 13.5, 11.7, 0.8 Hz, H-11b), 1.58 (1H, m, H-6b), 1.46 (3H, s, H-20), 1.13 (3H, s, H-19); **<sup>13</sup>C NMR (CDCl<sub>3</sub>):** δ 200.8 (C, C-1), 171.4 (C, C-18), 171.0 (C, C-17), 159.4 (CH, CHO), 143.7 (CH, C-15), 139.4 (CH, C-16), 125.1 (C, C-13), 108.3 (CH, C-14), 74.5 (CH, C-2), 72.0 (CH, C-12), 64.1 (CH, C-10), 53.5 (CH, C-4), 52.0 (CH<sub>3</sub>, CO<sub>2</sub>CH<sub>3</sub>), 51.3 (CH, C-8), 43.4 (CH<sub>2</sub>, C-11), 42.1 (C, C-5), 38.1 (CH<sub>2</sub>, C-6), 35.5 (C, C-9), 30.6 (CH<sub>2</sub>, C-3), 18.1 (CH<sub>2</sub>, C-7), 16.4 (CH<sub>3</sub>, C-19), 15.2 (CH<sub>3</sub>, C-20); **HRESIMS** [M + Na<sup>+</sup>] *m/z* 441.1525 (calcd for C<sub>22</sub>H<sub>26</sub>O<sub>8</sub>Na<sup>+</sup>, 441.1520).

**13,14,15,16-Tetrahydrosalvinorin A (10).** To a solution of **1** (20.3 mg, 46.9 μmol) in 50% CH<sub>2</sub>Cl<sub>2</sub>/MeOH (6 mL) was added 5% Rh/C (25.3 mg), and the suspension agitated under H<sub>2</sub> (4 atm) at room temperature for 90 minutes, when TLC indicated completion (*hR<sub>f</sub>* = 46 (**10**), 74 (**1**) in 20% acetone/CH<sub>2</sub>Cl<sub>2</sub>). The solution was filtered through diatomite filter aid and evaporated in vacuo. FCC (10% acetone/CHCl<sub>3</sub>) gave **10** (13-epimers, 1:1) as a clear resin (12 mg, 59%). For characterisation, the less polar epimer was separated by HPLC in EtOAc; [α]<sub>D</sub><sup>19</sup> -39° (*c* 0.4, CHCl<sub>3</sub>); **FTIR (film):** 2953, 1730, 1235, 1165 cm<sup>-1</sup>; **<sup>1</sup>H NMR (CDCl<sub>3</sub>):** δ 5.14 (1H, dd, *J* = 11.4, 8.6 Hz, H-2), 4.44 (1H, ddd, *J* = 11.7, 6.9, 5.0 Hz, H-12), 3.85 (1H, td, *J* = 8.5, 5.0 Hz, H-15a), 3.78 (1H, dd, *J* = 9.0, 7.6 Hz, H-16a), 3.74 (1H, dt, *J* = 8.5, 7.4 Hz, H-15b), 3.72 (3H, s, CO<sub>2</sub>CH<sub>3</sub>), 3.54 (1H, dd, *J* = 9.0, 6.7 Hz, H-16b), 2.73 (1H, m, H-4), 2.43 (1H, m, H-13), 2.30 (2H, m, H-3), 2.19 (1H, dd, *J* = 13.3, 5.0 Hz, H-11a), 2.17 (3H, s, OCOCH<sub>3</sub>), 2.15 (1H, m, H-7a), 2.12 (1H, br s, H-10), 2.08 (1H, dddd, *J* = 12.6, 8.7, 7.4, 5.0 Hz, H-14a), 1.95 (1H, dd, *J* = 11.5, 3.1 Hz, H-8), 1.81 (1H, ddt, *J* = 12.6, 8.3, 7.4 Hz, H-14b), 1.76 (1H, m, H-6a), 1.60 (1H, m, H-7b), 1.54 (1H, m, H-6b), 1.35 (3H, s, H-20), 1.26 (1H, ddd, *J* = 13.3, 11.7, 0.8 Hz, H-11b), 1.09 (3H, s, H-19); **<sup>13</sup>C NMR (CDCl<sub>3</sub>):** δ 202.0 (C, C-1), 171.5 (C, C-18), 171.3 (C, C-17), 169.9 (C, OCOCH<sub>3</sub>), 78.2 (CH, C-12), 75.0 (CH, C-2), 68.8 (CH<sub>2</sub>, C-16), 68.0 (CH<sub>2</sub>, C-15), 64.0 (CH, C-10), 53.5 (CH, C-4), 52.0 (CH<sub>3</sub>,

CO<sub>2</sub>CH<sub>3</sub>), 51.4 (CH, C-8), 45.1 (CH, C-13), 42.0 (C, C-5), 41.2 (CH<sub>2</sub>, C-11), 38.1 (CH<sub>2</sub>, C-6), 35.1 (C, C-9), 30.8 (CH<sub>2</sub>, C-3), 28.2 (CH<sub>2</sub>, C-14), 20.6 (CH<sub>3</sub>, OCOCH<sub>3</sub>), 18.1 (CH<sub>2</sub>, C-7), 16.3 (CH<sub>3</sub>, C-19), 15.1 (CH<sub>3</sub>, C-20); **HRESIMS** [M + Na<sup>+</sup>] *m/z* 459.1984 (calcd for C<sub>23</sub>H<sub>32</sub>O<sub>8</sub>Na<sup>+</sup>, 459.1989).

**Salvinorin A lactol (11).** A solution of **1** (15.8 mg, 36.5 μmol) in dry THF (1 mL) was warmed until fully dissolved, then cooled to -78 °C. DIBALH (1M in THF, 0.5 mL, 500 μmol) was added dropwise. The solution was stirred for 25 minutes, then quenched (sat. aq. NH<sub>4</sub>Cl dropwise), evaporated in vacuo until thick, diluted in water and extracted into Et<sub>2</sub>O (× 3). Washing (sat. aq. NaCl), standard drying and FCC (6-10% acetone/CH<sub>2</sub>Cl<sub>2</sub> gradient) monitored by TLC (*hRf* = 28 (**11**), 64 (**1**) in 10% acetone/CH<sub>2</sub>Cl<sub>2</sub>) gave **11** as a clear resin (10.4 mg, 65% (81% borsm)); **FTIR (film)**: 3446, 2953, 1730, 1237, 1161, 875 cm<sup>-1</sup>; **<sup>1</sup>H NMR, major (17β) anomer (CDCl<sub>3</sub>)**: δ 7.36 (1H, br s, H-16), 7.34 (1H, t, *J* = 1.8 Hz, H-15), 6.38 (1H, dd, *J* = 1.8, 0.9 Hz, H-14), 5.12 (1H, m, H-2), 4.87 (1H, dd, *J* = 11.6, 2.4 Hz, H-12), 4.80 (1H, d, *J* = 8.7 Hz, H-17), 3.70 (3H, s, CO<sub>2</sub>CH<sub>3</sub>), 2.74 (1H, m, H-4), 2.25 (2H, m, H-3), 2.14 (3H, s, OCOCH<sub>3</sub>), 2.11 (1H, dd, *J* = 13.2, 2.4 Hz, H-11a), 2.07 (1H, d, *J* = 0.9 Hz, H-10), 1.80 (1H, ddd, *J* = 13.8, 6.9, 3.2 Hz, H-7a), 1.70 (1H, dt, *J* = 13.5, 3.2 Hz, H-6a), 1.58 (1H, m, H-6b), 1.38 (3H, s, H-20), 1.37 (1H, m, H-7b), 1.21 (1H, ddd, *J* = 13.2, 11.6, 0.9 Hz, H-11b), 1.12 (1H, m, H-8), 1.08 (3H, s, H-19); **<sup>13</sup>C NMR, major (17β) anomer (CDCl<sub>3</sub>)**: δ 202.5 (C, C-1), 171.9 (C, C-18), 169.9 (C, OCOCH<sub>3</sub>), 143.0 (CH, C-15), 139.1 (CH, C-16), 126.2 (C, C-13), 108.8 (CH, C-14), 94.2 (CH, C-17), 75.0 (CH, C-2), 66.2 (CH, C-12), 65.4 (CH, C-10), 53.6 (CH, C-4), 52.1 (CH, C-8), 51.8 (CH<sub>3</sub>, CO<sub>2</sub>CH<sub>3</sub>), 44.7 (CH<sub>2</sub>, C-11), 42.4 (C, C-5), 38.8 (CH<sub>2</sub>, C-6), 35.6 (C, C-9), 30.8 (CH<sub>2</sub>, C-3), 20.6 (CH<sub>3</sub>, OCOCH<sub>3</sub>), 17.6 (CH<sub>2</sub>, C-7), 16.7 (CH<sub>3</sub>, C-19), 15.0 (CH<sub>3</sub>, C-20).

**17-Deoxysalvinorin A (12).** To a stirred solution of lactol **11** (18.3 mg, 42.1 μmol), in dry CH<sub>2</sub>Cl<sub>2</sub> (1 mL) under Ar, was added Et<sub>3</sub>SiH (20 μL, 125 μmol). The solution was cooled to 0 °C, and BF<sub>3</sub>•Et<sub>2</sub>O (10 μL, 79 μmol) was added. The light brown solution was stirred at 0 °C for 2 h, when TLC indicated completion (*hRf* = 72 (**12/13**), 38 (**11**) in 10% acetone/CH<sub>2</sub>Cl<sub>2</sub>; 24 (**12**), 42 (**13**) in 2% acetone/CH<sub>2</sub>Cl<sub>2</sub>). The reaction was quenched (0.5 mL sat. NaHCO<sub>3</sub>), and partitioned between Et<sub>2</sub>O and brine. Standard drying and FCC (0-4% acetone/CH<sub>2</sub>Cl<sub>2</sub> gradient) gave enol ether **13** (4.1 mg, 23%) along with **12** as a clear resin (8.4 mg, 48%); [α]<sub>D</sub><sup>20</sup> -81° (*c* 0.4, CH<sub>2</sub>Cl<sub>2</sub>); **FTIR (film)**: 2950, 1730, 1236, 1201, 1161, 875 cm<sup>-1</sup>; **<sup>1</sup>H NMR (CDCl<sub>3</sub>)**: δ 7.33 (2H, m, H-15 & 16), 6.34 (1H, t, *J* = 1.4 Hz, H-14), 5.14 (1H, dd, *J* = 10.7, 9.4 Hz, H-2), 4.70 (1H, dd, *J* = 11.6, 2.5 Hz, H-12), 3.70 (3H, s, CO<sub>2</sub>CH<sub>3</sub>), 3.58 (2H, d, *J* = 7.6 Hz, H-17), 2.77 (1H, m, H-4), 2.26 (2H, m, H-3), 2.15 (3H, s, OCOCH<sub>3</sub>), 2.12 (1H, dd, *J* = 13.1, 2.6 Hz, H-11a), 2.09 (1H, d, *J* = 1.0 Hz, H-10), 1.66 (2H, m, H-6), 1.48 (1H, m, H-8), 1.38 (3H, s, H-20), 1.30 (2H, m, H-7), 1.19 (1H, ddd, *J* = 13.1, 11.6, 1.0 Hz, H-11b), 1.08 (3H, s, H-19); **<sup>13</sup>C NMR (CDCl<sub>3</sub>)**: δ 202.5 (C, C-1), 171.9 (C, C-18), 169.9 (C, OCOCH<sub>3</sub>), 142.9 (CH, C-15), 138.9 (CH, C-16), 127.0 (C, C-13), 108.7 (CH, C-14), 75.0 (CH, C-2), 67.5 (CH, C-12), 67.1 (CH<sub>2</sub>, C-17), 65.6 (CH, C-10), 53.8 (CH, C-4), 51.8 (CH<sub>3</sub>, CO<sub>2</sub>CH<sub>3</sub>), 46.4 (CH, C-8), 45.4 (CH<sub>2</sub>, C-11), 42.7 (C, C-5), 39.0 (CH<sub>2</sub>, C-6), 34.6 (C, C-9), 30.8 (CH<sub>2</sub>, C-3), 20.6 (CH<sub>3</sub>, OCOCH<sub>3</sub>), 19.6 (CH<sub>2</sub>, C-7), 16.8 (CH<sub>3</sub>, C-19), 13.7 (CH<sub>3</sub>, C-20); **HRESIMS** [M + Na<sup>+</sup>] *m/z* 441.1881 (calcd for C<sub>23</sub>H<sub>30</sub>O<sub>7</sub>Na<sup>+</sup>, 441.1884).

**8,17-Didehydro-17-deoxysalvinorin A (13).** To a solution of lactol **11** (15.1 mg, 34.7 μmol) in

CH<sub>2</sub>Cl<sub>2</sub> were added Et<sub>3</sub>SiH (25  $\mu$ L, 156  $\mu$ mol) and Amberlyst 15 resin (22 mg). The sealed flask was stirred at rt for 24 h. Filtration, evaporation and FCC (1% acetone/CH<sub>2</sub>Cl<sub>2</sub>) gave **13** as a clear resin (11.0 mg, 76%);  $[\alpha]_D^{23}$  -60° (c 0.5, CH<sub>2</sub>Cl<sub>2</sub>); **FTIR (film)**: 2927, 1731, 1237, 1203, 1164, 875 cm<sup>-1</sup>; **<sup>1</sup>H NMR (CDCl<sub>3</sub>)**:  $\delta$  7.38 (1H, br s, H-16), 7.36 (1H, t,  $J$  = 1.9 Hz, H-15), 6.36 (1H, dd,  $J$  = 1.9, 0.8 Hz, H-14), 6.26 (1H, d,  $J$  = 1.8 Hz, H-17), 5.12 (1H, dd,  $J$  = 11.0, 9.0 Hz, H-2), 4.78 (1H, dd,  $J$  = 11.7, 2.1 Hz, H-12), 3.70 (3H, s, CO<sub>2</sub>CH<sub>3</sub>), 2.72 (1H, m, H-4), 2.33 (1H, dd,  $J$  = 13.6, 2.1 Hz, H-11a), 2.28 (2H, m, H-3), 2.27 (1H, m, H-7a), 2.16 (3H, s, OCOCH<sub>3</sub>), 2.12 (1H, d,  $J$  = 0.8 Hz, H-10), 1.94 (1H, ddd,  $J$  = 14.6, 4.6, 2.6 Hz, H-7b), 1.69 (1H, ddd,  $J$  = 13.2, 4.4, 2.6 Hz, H-6a), 1.52 (3H, s, H-20), 1.50 (1H, td,  $J$  = 13.2, 4.6 Hz, H-6b), 1.40 (1H, ddd,  $J$  = 13.6, 11.6, 0.8 Hz, H-11b), 1.15 (3H, s, H-19); **<sup>13</sup>C NMR (CDCl<sub>3</sub>)**:  $\delta$  202.9 (C, C-1), 172.0 (C, C-18), 169.9 (C, OCOCH<sub>3</sub>), 143.2 (CH, C-15), 139.3 (CH, C-16), 137.1 (CH, C-17), 125.8 (C, C-13), 117.0 (C, C-8), 108.7 (CH, C-14), 75.2 (CH, C-2), 66.6 (CH, C-12), 65.5 (CH, C-10), 53.5 (CH, C-4), 51.7 (CH<sub>3</sub>, CO<sub>2</sub>CH<sub>3</sub>), 44.4 (CH<sub>2</sub>, C-11), 42.8 (C, C-5), 40.1 (CH<sub>2</sub>, C-6), 34.1 (C, C-9), 30.6 (CH<sub>2</sub>, C-3), 22.8 (CH<sub>3</sub>, C-20), 22.6 (CH<sub>2</sub>, C-7), 20.6 (CH<sub>3</sub>, OCOCH<sub>3</sub>), 15.4 (CH<sub>3</sub>, C-19); **HRESIMS** [M + Na<sup>+</sup>]  $m/z$  439.1728 (calcd for C<sub>23</sub>H<sub>28</sub>O<sub>7</sub>Na<sup>+</sup>, 439.1727).

**O-Demethyl-18-deoxysalvinorin A (15)**. To dry EtSH (1.5 mL, 20.2 mmol) at 0 °C, stirred rapidly under a stream of Ar, was added n-BuLi in hexanes (2.1M, 8 mL, 16.9 mmol). Immediate, violent gas evolution was accompanied by the sudden formation of white solid. The flask was swirled, mixing the precipitate into a slurry, and rapid stirring continued while the remaining n-BuLi was added. After warming to room temperature, the solution was evaporated under reduced pressure, and finally dried under high vacuum at 50 °C for 30 min, giving LiSEt as a white powder.

**1** (42.2 mg, 97.6  $\mu$ mol) and LiSEt (13.7 mg, 201  $\mu$ mol) under Ar were dissolved in DMPU (1 mL). The yellow solution was stirred at 55 °C for 23 h, when TLC indicated consumption of **1** and intermediate **2** ( $hR_f$  = 0 smearing to 20 (**14**), 63 (**2**), 71 (**1**) in 1% H<sub>2</sub>SO<sub>4</sub>/10% MeOH/CH<sub>2</sub>Cl<sub>2</sub>). The cooled solution was diluted in EtOAc and washed (10% HCl  $\times$  3, then water), then extracted into 1% NaHCO<sub>3</sub> ( $\times$  3). The pooled aqueous fractions were acidified at 0 °C with 10% HCl, then extracted into CH<sub>2</sub>Cl<sub>2</sub> ( $\times$  3). Standard drying gave an amber resin, which was treated with Ac<sub>2</sub>O (0.4 mL) in pyridine (1 mL) and catalytic DMAP at room temperature for 17 h. After cooling to 0 °C and quenching (water), the solution was diluted in EtOAc and washed (10% HCl and sat. NH<sub>4</sub>Cl). Standard drying gave acids **14** (H-8 $\alpha$ : $\beta$ , ~1.4:1) as an amber resin (29.7 mg, 73% over two steps). The mixed acids (35.2 mg, 84.0  $\mu$ mol) were stirred in dry THF (1 mL) under Ar in a flask fitted with a reflux condenser. BH<sub>3</sub>•THF (1.0 M, 110  $\mu$ L, 110  $\mu$ mol) was added dropwise; the solution was heated to 55 °C and stirred at this temperature for 90 minutes, when TLC indicated completion ( $hR_f$  = 0 smearing to 30 (**14**), 56 (**15**, 8-*epi*-**15**) in 1% NEt<sub>3</sub>/EtOAc). The solution was cooled to room temperature, quenched with water (dropwise), and evaporated in vacuo to give a cloudy paste. This was diluted in sat. NaHCO<sub>3</sub> and extracted into CH<sub>2</sub>Cl<sub>2</sub> ( $\times$ 3). Standard drying and FCC (10-25% acetone/Et<sub>2</sub>O gradient) monitored by TLC ( $hR_f$  = 30 (8-*epi*-**15**), 20 (**15**) in Et<sub>2</sub>O) gave 8-*epi*-**15** (8.4 mg, 25%) along with **15** as a clear resin (7.7 mg, 23%);  $[\alpha]_D^{25}$  -19° (c 0.3, CH<sub>2</sub>Cl<sub>2</sub>); **FTIR (film)**: 3468, 2944, 1727, 1237, 1162, 875 cm<sup>-1</sup>; **<sup>1</sup>H NMR (CDCl<sub>3</sub>)**:  $\delta$  7.41 (1H, br s, H-16), 7.39 (1H, t,  $J$  = 1.9 Hz, H-15), 6.38 (1H, dd,  $J$  = 1.9, 0.8 Hz, H-14), 5.52 (1H, dd,  $J$  = 11.7, 5.3 Hz, H-12), 5.15 (1H, dd,  $J$  = 12.3, 7.6

Hz, H-2), 3.94 (1H, dd,  $J = 10.3, 3.9$  Hz, H-18a), 3.49 (1H, dd,  $J = 10.3, 8.0$  Hz, H-18b), 2.54 (1H, ddd,  $J = 12.3, 7.0, 2.6$  Hz, H-3a), 2.49 (1H, dd,  $J = 13.3, 5.3$  Hz, H-11a), 2.17 (1H, d,  $J = 0.9$  Hz, H-10), 2.16 (3H, s, OCOCH<sub>3</sub>), 2.16 (1H, m, H-7a), 2.06 (1H, dd,  $J = 12.1, 3.0$  Hz, H-8), 1.99 (1H, dt,  $J = 13.3, 3.3$  Hz, H-6a), 1.89 (1H, m, H-4), 1.80 (1H, q,  $J = 12.3$  Hz, H-3b), 1.64 (1H, dddd,  $J = 14.0, 13.5, 12.1, 3.4$  Hz, H-7b), 1.58 (1H, ddd,  $J = 13.3, 11.7, 0.9$  Hz, H-11b), 1.45 (3H, s, H-20), 1.43 (1H, m, H-6b), 0.96 (3H, s, H-19); <sup>13</sup>C NMR (CDCl<sub>3</sub>): δ 203.6 (C, C-1), 171.3 (C, C-17), 170.0 (C, OCOCH<sub>3</sub>), 143.7 (CH, C-15), 139.4 (CH, C-16), 125.2 (C, C-13), 108.4 (CH, C-14), 76.0 (CH, C-2), 72.1 (CH, C-12), 64.5 (CH, C-10), 61.7 (CH<sub>2</sub>, C-18), 51.5 (CH, C-8), 50.8 (CH, C-4), 43.4 (CH<sub>2</sub>, C-11), 41.9 (C, C-5), 38.1 (CH<sub>2</sub>, C-6), 35.3 (C, C-9), 31.8 (CH<sub>2</sub>, C-3), 20.6 (CH<sub>3</sub>, OCOCH<sub>3</sub>), 18.1 (CH<sub>2</sub>, C-7), 16.7 (CH<sub>3</sub>, C-19), 15.3 (CH<sub>3</sub>, C-20); HRESIMS [M + Na<sup>+</sup>]  $m/z$  427.1729 (calcd for C<sub>22</sub>H<sub>28</sub>O<sub>7</sub>Na<sup>+</sup>, 427.1727).

**1-Deoxysalvinorin A (18).** A solution of NaBH<sub>4</sub> (11.6 mg, 307 μmol) and **1** (108 mg, 249 μmol) in dry EtOH (9 mL)/CH<sub>2</sub>Cl<sub>2</sub> (2 mL) was stirred under Ar at 40 °C. The cloudy solution gradually cleared. At 4 h, TLC indicated completion ( $hR_f = 45$  (**1**), 25 (8-*epi*-**7**), 14 (**7**) in Et<sub>2</sub>O). The solution was evaporated in vacuo, and the residue partitioned between brine and CH<sub>2</sub>Cl<sub>2</sub> (× 3). Standard drying gave an impure ~1:1 mixture of **7** and 8-*epi*-**7** (103 mg). This crude mixture and 1,1'-thiocarbonyldiimidazole (118 mg, 662 μmol) were dissolved in dry DMF and stirred under Ar at 90 °C for 6 h, when TLC indicated completion ( $hR_f = 86$  (**16**), 62 (7/8-*epi*-**7**) in 40% acetone/ CH<sub>2</sub>Cl<sub>2</sub>). The cooled solution was diluted in EtOAc/Et<sub>2</sub>O and washed (10% HCl × 3, then brine). Standard drying followed by FCC (1-5% acetone/ CH<sub>2</sub>Cl<sub>2</sub> gradient) gave the cyclic thionocarbonates **16** (H-8α:β, ~1:2), as a clear resin (72 mg, 67% over two steps). The thionocarbonate mixture was dissolved in dry toluene (2 mL). The resulting cloudy solution was stirred under Ar at 80 °C. A solution of freshly distilled Bu<sub>3</sub>SnH (150 μL, 550 μmol) and AIBN (5.4 mg, 33 μmol) in dry toluene (2 mL) was added in small portions over 4 h; the solution gradually cleared. After a further 2 h, TLC indicated completion ( $hR_f = 70$  (byproduct), 55 (**16**), 20 (**17**/8-*epi*-**17**) in 10% acetone/ CH<sub>2</sub>Cl<sub>2</sub>). The solution was cooled and loaded directly onto silica gel, rinsing the flask with CH<sub>2</sub>Cl<sub>2</sub> (× 2). Repeated FCC (50-70% EtOAc/petrol gradient) monitored by TLC ( $hR_f = 47$  (8-*epi*-**17**), 40 (**17**) in Et<sub>2</sub>O) gave 8-*epi*-**17** (15.5 mg, 25%) along with **17** (13.5 mg, 22%) as a clear resin, which was dissolved in pyridine (0.3 mL) and Ac<sub>2</sub>O (0.3 mL) with a crystal of DMAP. The solution was stirred at rt for 2.5 h, when TLC indicated completion ( $hR_f = 74$  (**18**) in Et<sub>2</sub>O, visualized in KMnO<sub>4</sub>), then evaporated in vacuo. FCC (60% Et<sub>2</sub>O/*n*-pentane) gave **18** as a clear resin (12.3 mg, 82%);  $[\alpha]_D^{21} -8^\circ$  ( $c$  0.1, CH<sub>2</sub>Cl<sub>2</sub>); FTIR (film): 2952, 1729, 1365, 1245, 1153, 1024, 875 cm<sup>-1</sup>; <sup>1</sup>H NMR (CDCl<sub>3</sub>): δ 7.43 (1H, br s, H-16), 7.42 (1H, t,  $J = 1.8$  Hz, H-15), 6.41 (1H, dd,  $J = 1.9, 1.0$  Hz, H-14), 5.47 (1H, ddd,  $J = 11.2, 5.6, 0.7$  Hz, H-12), 4.74 (1H, tt,  $J = 11.0, 5.5$  Hz, H-2), 3.66 (3H, s, CO<sub>2</sub>CH<sub>3</sub>), 2.28 (1H, dd,  $J = 13.5, 5.9$  Hz, H-11a), 2.18 (1H, dd,  $J = 10.9, 3.5$  Hz, H-4), 2.15 (1H, dd,  $J = 10.0, 3.5$  Hz, H-8), 2.09 (1H, dq,  $J = 14.2, 3.4$  Hz, H-7a), 2.05 (3H, s, OCOCH<sub>3</sub>), 1.92 (1H, m, H-1a), 1.89 (2H, m, H-3), 1.74 (1H, dt,  $J = 13.5, 3.3$  Hz, H-6a), 1.65 (1H, m, H-7b), 1.64 (1H, dd,  $J = 13.6, 11.5$  Hz, H-11b), 1.50 (1H, td,  $J = 12.8, 11.2$  Hz, H-1b), 1.31 (1H, td,  $J = 13.6, 3.7$  Hz, H-6b), 1.11 (3H, s, H-19), 1.10 (1H, dd,  $J = 12.9, 2.2$  Hz, H-10), 1.06 (3H, s, H-20); <sup>13</sup>C NMR (CDCl<sub>3</sub>): δ 172.7 (C, C-18), 171.9 (C, C-17), 170.5 (C, OCOCH<sub>3</sub>), 143.8 (CH, C-15), 139.4 (CH, C-16), 125.6 (C, C-13), 108.4 (CH, C-14), 71.8 (2 × CH, C-2 & 12), 54.2 (CH, C-4), 52.9 (CH, C-

10), 51.5 (CH<sub>3</sub>, CO<sub>2</sub>CH<sub>3</sub>), 51.2 (CH, C-8), 43.9 (CH<sub>2</sub>, C-11), 38.0 (CH<sub>2</sub>, C-6), 36.9 (C, C-9), 36.2 (C, C-5), 29.6 (CH<sub>2</sub>, C-3), 26.7 (CH<sub>2</sub>, C-1), 21.3 (CH<sub>3</sub>, OCOCH<sub>3</sub>), 18.2 (CH<sub>2</sub>, C-7), 15.0 (CH<sub>3</sub>, C-19), 14.6 (CH<sub>3</sub>, C-20); **HRESIMS** [M + Na<sup>+</sup>] *m/z* 441.1893 (calcd for C<sub>23</sub>H<sub>30</sub>O<sub>7</sub>Na<sup>+</sup>, 441.1884).

**IUPAC/NIST Chemical Identifiers (INChIs):**<sup>6,7</sup> **1**, 1.12Beta/C23H28O8/c1-12(24)30-16-9-15(20(26)28-4)22(2)7-5-14-21(27)31-17(13-6-8-29-11-13)10-23(14,3)19(22)18(16)25/h1-4H3,5H2,6H,7H2,8H,9-10H2,11H,14-17H,19H/t14-,15-,16-,17-,19-,22-,23-/m0/s1; **8-*epi*-1**, 1.12Beta/C23H28O8/c1-12(24)30-16-9-15(20(26)28-4)22(2)7-5-14-21(27)31-17(13-6-8-29-11-13)10-23(14,3)19(22)18(16)25/h1-4H3,5H2,6H,7H2,8H,9-10H2,11H,14-17H,19H/t14-,15+,16+,17+,19+,22+,23+/m1/s1; **3**, 1.12Beta/C22H26O8/c1-21-6-4-13-20(26)30-16(12-5-7-28-10-12)9-22(13,2)18(21)17(24)15(29-11-23)8-14(21)19(25)27-3/h1-3H3,4H2,5H,6H2,7H,8-9H2,10-11H,13-16H,18H/t13-,14-,15-,16-,18-,21-,22-/m0/s1; **6**, 1.12Beta/C25H30O9/c1-13(26)32-18-10-17(22(28)30-5)24(3)8-6-16-23(29)34-19(15-7-9-31-12-15)11-25(16,4)21(24)20(18)33-14(2)27/h1-5H3,6H2,7H,8H2,9-10H,11H2,12H,16H,18-21H/t16-,18-,19-,20-,21-,24-,25-/m0/s1; **8**, 1.12Beta/C23H30O8/c1-12(24)30-16-9-15(20(26)28-4)22(2)7-5-14-21(27)31-17(13-6-8-29-11-13)10-23(14,3)19(22)18(16)25/h1-4H3,5H2,6H,7H2,8H,9-10H2,11H,14-19H,25H/t14-,15-,16-,17-,18-,19-,22-,23-/m0/s1; **9**, 1.12Beta/C25H32O9/c1-13(26)32-18-10-17(22(28)30-5)24(3)8-6-16-23(29)34-19(15-7-9-31-12-15)11-25(16,4)21(24)20(18)33-14(2)27/h1-5H3,6H2,7H,8H2,9H,10-11H2,12H,16-21H/t16-,17-,18-,19-,20-,21-,24-,25-/m0/s1; **10**, 1.12Beta/C23H32O8/c1-12(24)30-16-9-15(20(26)28-4)22(2)7-5-14-21(27)31-17(13-6-8-29-11-13)10-23(14,3)19(22)18(16)25/h1-4H3,5-11H2,13-17H,19H/t13u,14-,15-,16-,17-,19-,22-,23-/m0/s1; **11**, 1.12Beta/C23H30O8/c1-12(24)30-16-9-15(20(26)28-4)22(2)7-5-14-21(27)31-17(13-6-8-29-11-13)10-23(14,3)19(22)18(16)25/h1-4H3,5H2,6H,7H2,8H,9-10H2,11H,14-17H,19H,21H,27H/t14-,15-,16-,17-,19-,21u,22-,23-/m0/s1; **12**, 1.12Beta/C23H30O7/c1-13(24)30-17-9-16(21(26)27-4)22(2)7-5-15-12-29-18(14-6-8-28-11-14)10-23(15,3)20(22)19(17)25/h1-4H3,5H2,6H,7H2,8H,9-10H2,11H,12H2,15-18H,20H/t15-,16-,17-,18-,20-,22-,23-/m0/s1; **13**, 1.12Beta/C23H28O7/c1-13(24)30-17-9-16(21(26)27-4)22(2)7-5-15-12-29-18(14-6-8-28-11-14)10-23(15,3)20(22)19(17)25/h1-4H3,5H2,6H,7H2,8H,9-10H2,11-12H,16-18H,20H/t16-,17-,18-,20-,22-,23-/m0/s1; **15**, 1.12Beta/C22H28O7/c1-12(24)28-16-8-14(10-23)21(2)6-4-15-20(26)29-17(13-5-7-27-11-13)9-22(15,3)19(21)18(16)25/h1-3H3,4H2,5H,6H2,7H,8-10H2,11H,14-17H,19H,23H/t14-,15-,16-,17-,19-,21-,22-/m0/s1; **18**, 1.12Beta/C23H30O7/c1-13(24)29-15-9-17(20(25)27-4)22(2)7-5-16-21(26)30-18(14-6-8-28-12-14)11-23(16,3)19(22)10-15/h1-4H3,5H2,6H,7H2,8H,9-11H2,12H,15-19H/t15-,16-,17-,18-,19-,22-,23-/m0/s1.

1. Roth, B. L.; Baner, K.; Westkaemper, R.; Siebert, D.; Rice, K. C.; Steinberg, S.; Ernsberger, P.; Rothman, R. B. Salvinorin A: A potent naturally occurring nonnitrogenous  $\kappa$  opioid selective agonist. *Proc. Natl. Acad. Sci. U.S.A.* **2002**, *99*, 11934-11939.
2. Glennon, R. A.; Lee, M.; Rangisetty, J. B.; Dukat, M.; Roth, B. L.; Savage, J. E.; McBride, A.; Rauser, L.; Hufeisen, S.; Lee, D. K. 2-Substituted tryptamines: agents with selectivity for 5-HT<sub>6</sub> serotonin receptors. *J. Med. Chem.* **2000**, *43*, 1011-1018.
3. NIMH Psychoactive Drug Screening Program. <http://pdsp.cwru.edu> (accessed Oct 2004).

4. Chavkin, C.; Sud, S.; Jin, W.; Stewart, J.; Zjawiony, J. K.; Siebert, D. J.; Toth, B. A.; Hufeisen, S. J.; Roth, B. L. Salvinorin A, an Active Component of the Hallucinogenic Sage *Salvia divinorum* Is a Highly Efficacious  $\kappa$ -Opioid Receptor Agonist: Structural and Functional Considerations. *J. Pharmacol. Exp. Ther.* **2004**, 308, 1197-1203.
5. Pauwels, P. J.; Colpaert, F. C. Heterogeneous ligand-mediated  $\text{Ca}^{++}$  responses at wt and mutant  $\alpha_{2A}$ -adrenoceptors suggest multiple ligand activation binding sites at the  $\alpha_{2A}$ -adrenoceptor. *Neuropharmacology* **2000**, 39, 2101-2111.
6. IUPAC-NIST Chemical Identifier Project.  
<http://www.iupac.org/projects/2000/2000-025-1-800.html> (accessed Oct 2004).
7. World Wide Molecular Matrix Service: Generate INChI.  
<http://wwwmm.ch.cam.ac.uk/sdf2inchi/index.html> (accessed Oct 2004).



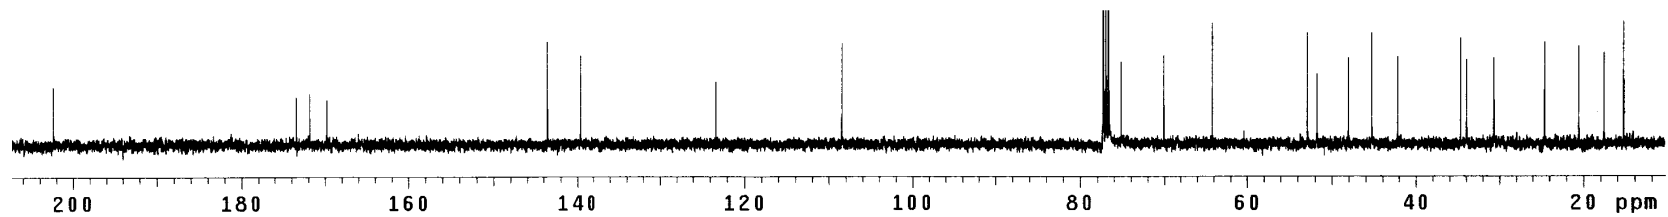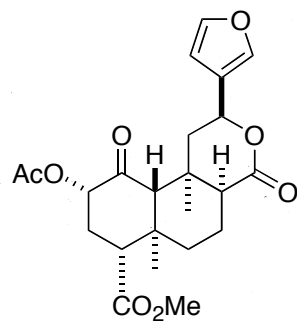

8-*epi*-Salvinorin A (8-*epi*-1)  
 $^1\text{H}$  NMR (400 MHz,  $\text{CDCl}_3$ )

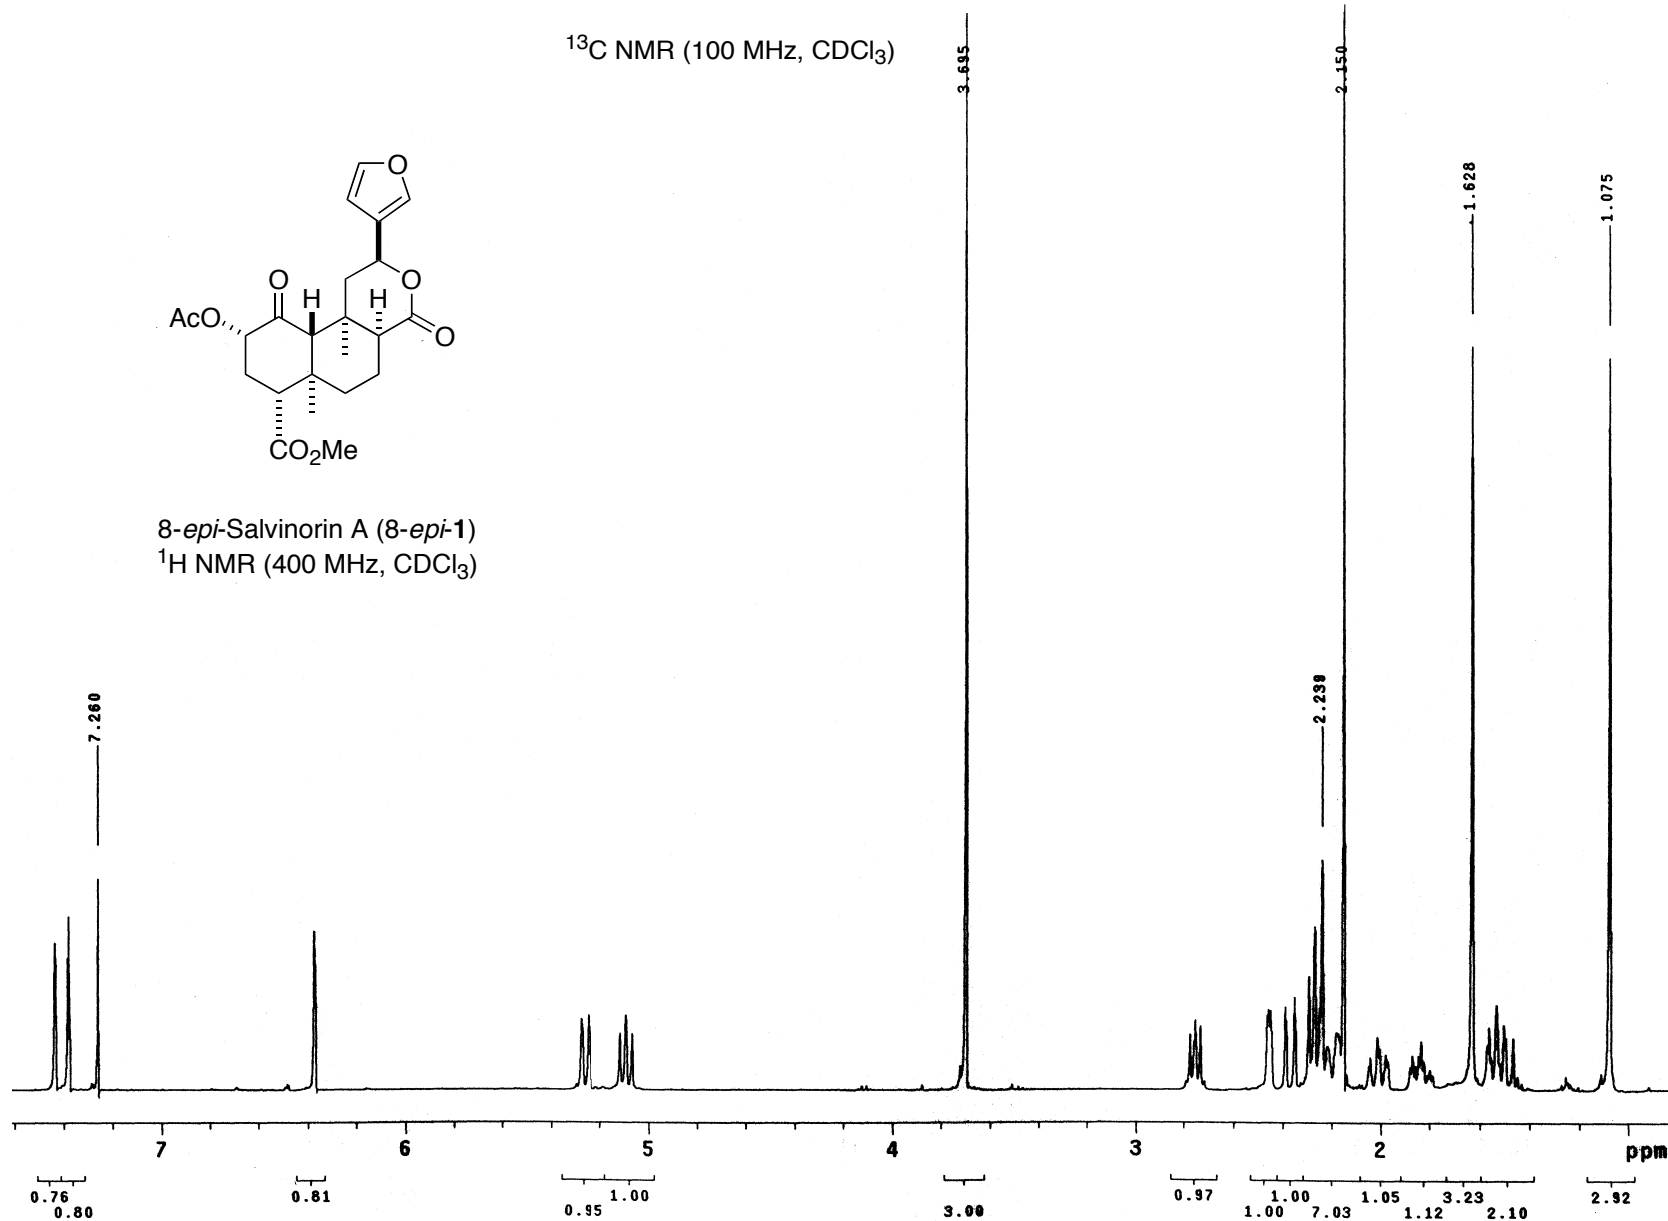

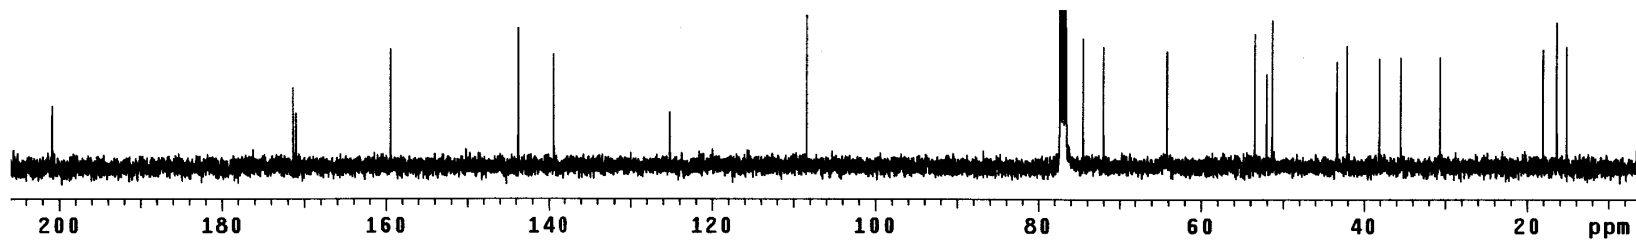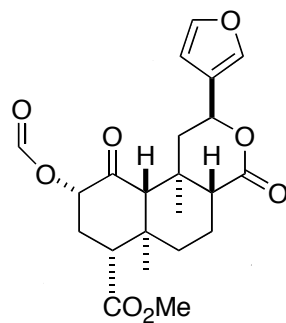

Salvinorin B formate (**3**)  
 $^1\text{H}$  NMR (400 MHz,  $\text{CDCl}_3$ )

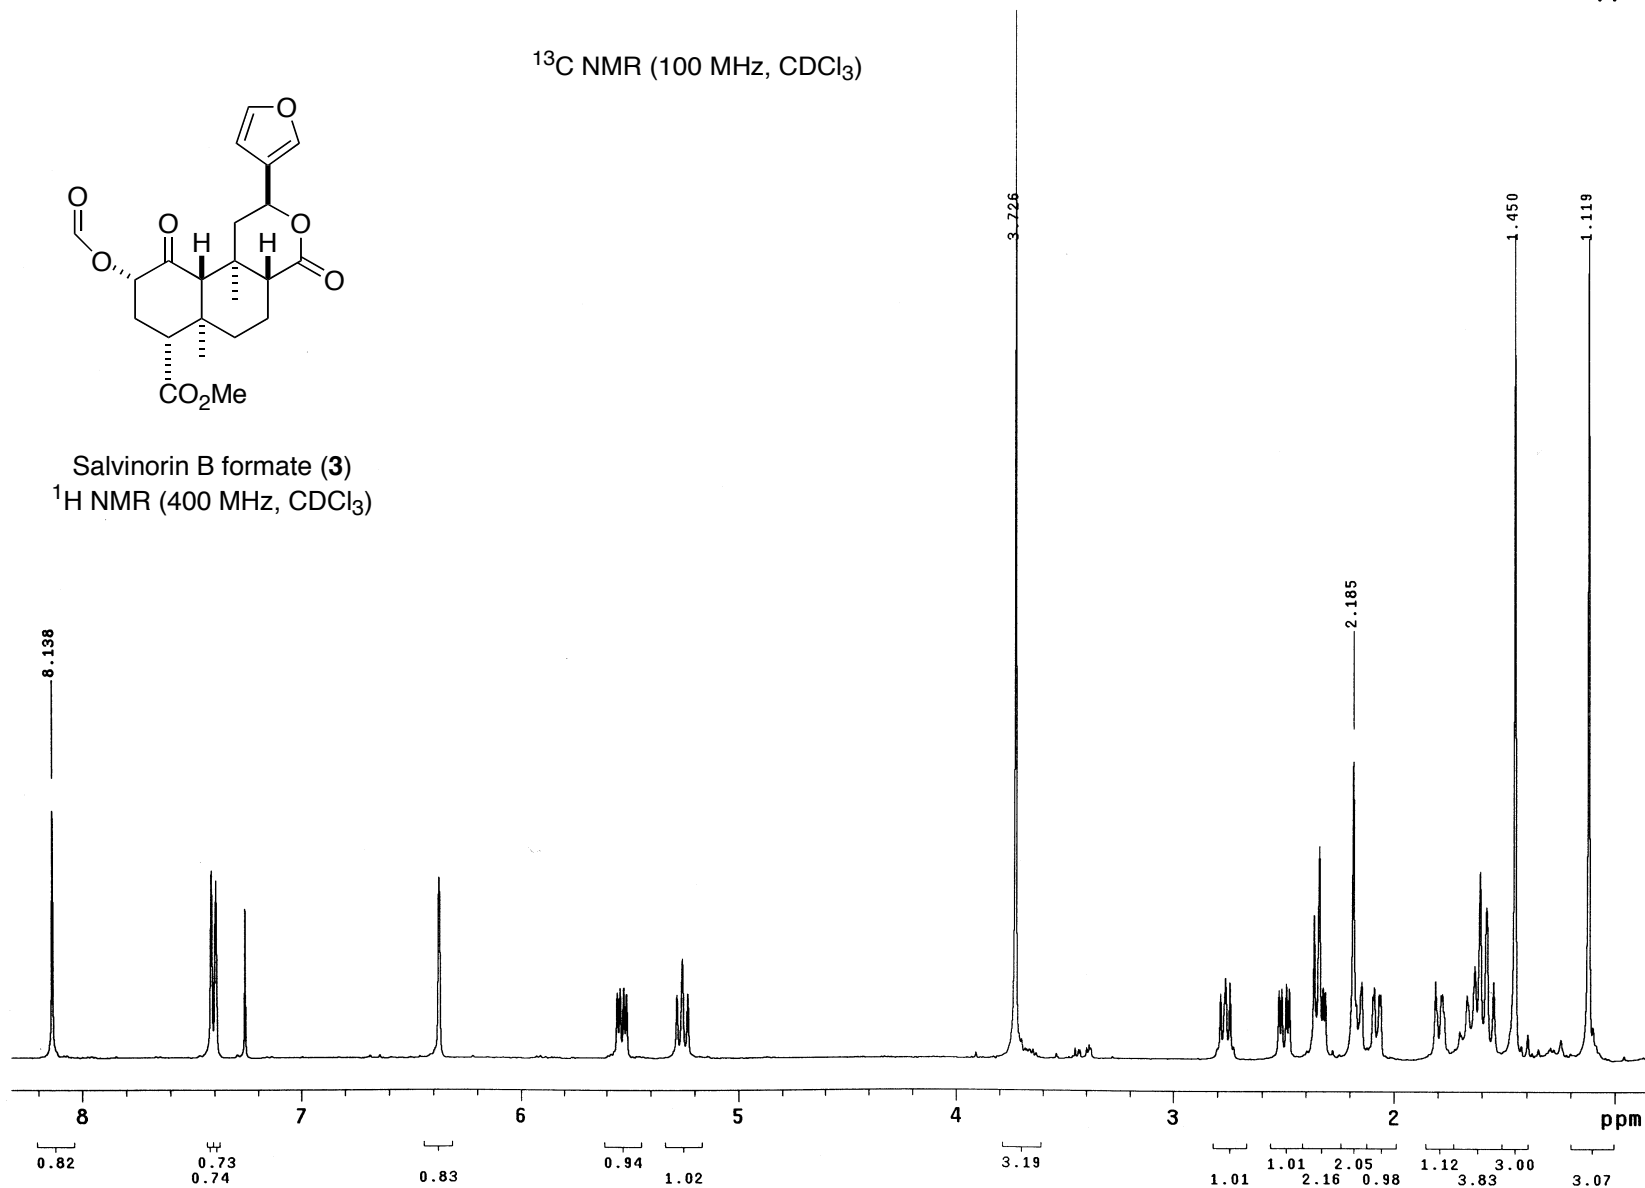

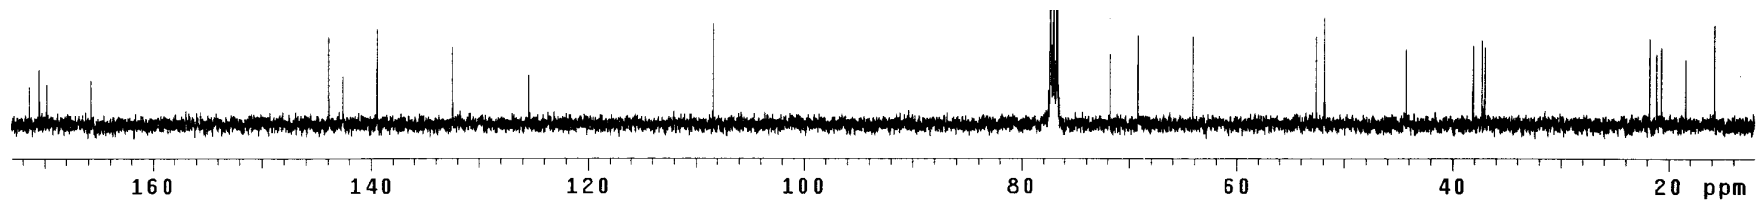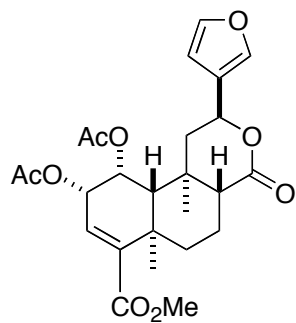

Salvinorin C (6)  
 $^1\text{H}$  NMR (400 MHz,  $\text{CDCl}_3$ )

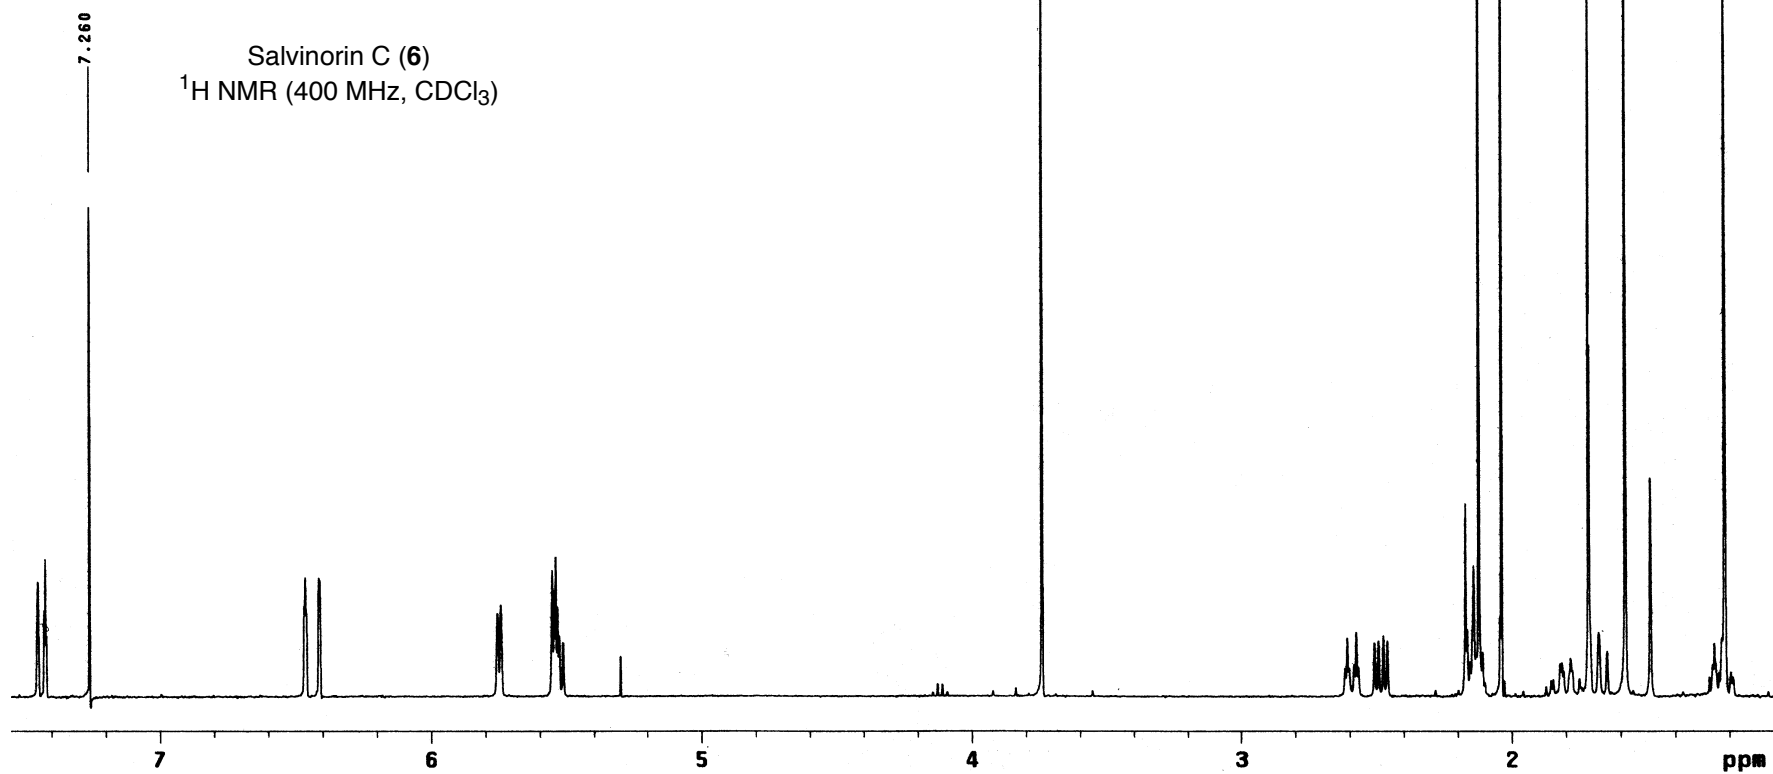

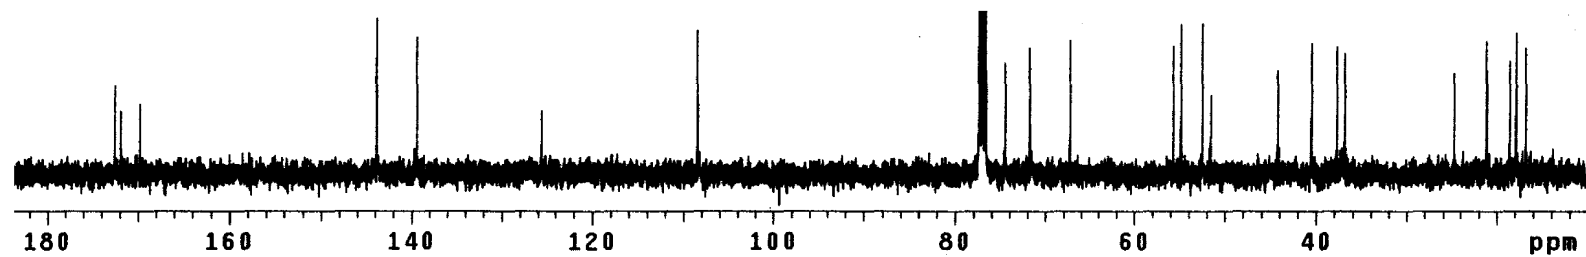

$^{13}\text{C}$  NMR (100 MHz,  $\text{CDCl}_3$ )

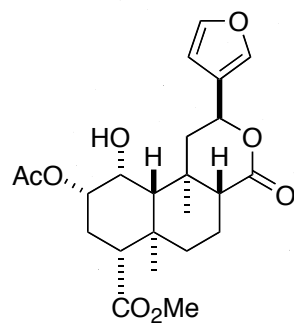

(4*R*)-3,4-Dihydrosalvinorin E (**8**)  
 $^1\text{H}$  NMR (400 MHz,  $\text{CDCl}_3$ )

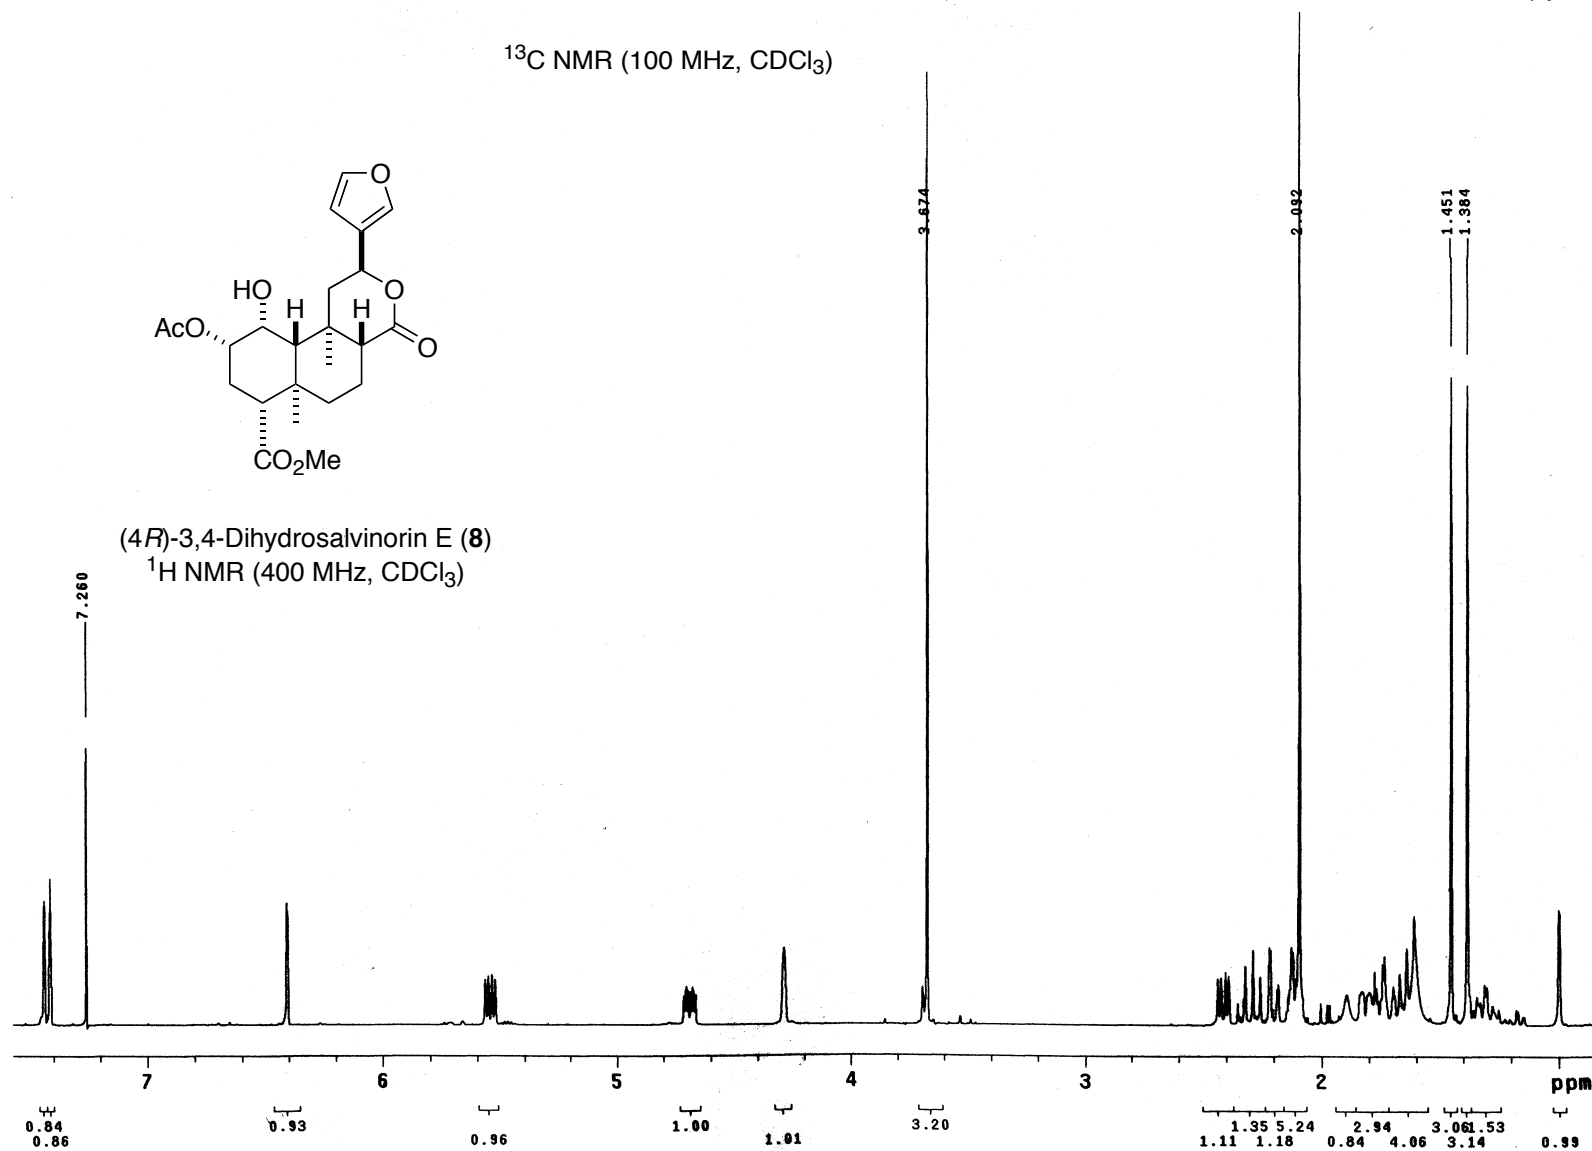

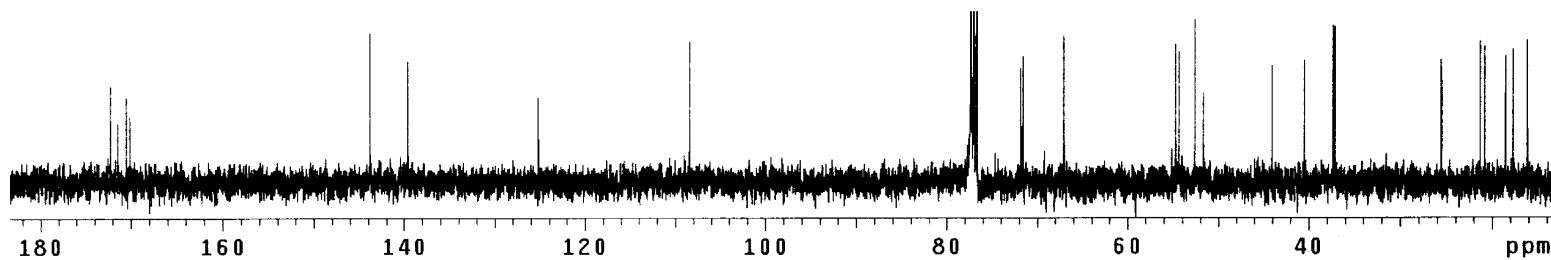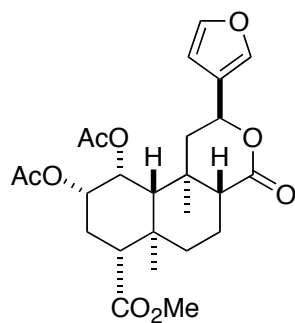

(4R)-3,4-Dihydrosalvinorin C (9)  
 $^1\text{H}$  NMR (400 MHz,  $\text{acetone-}d_6$ )

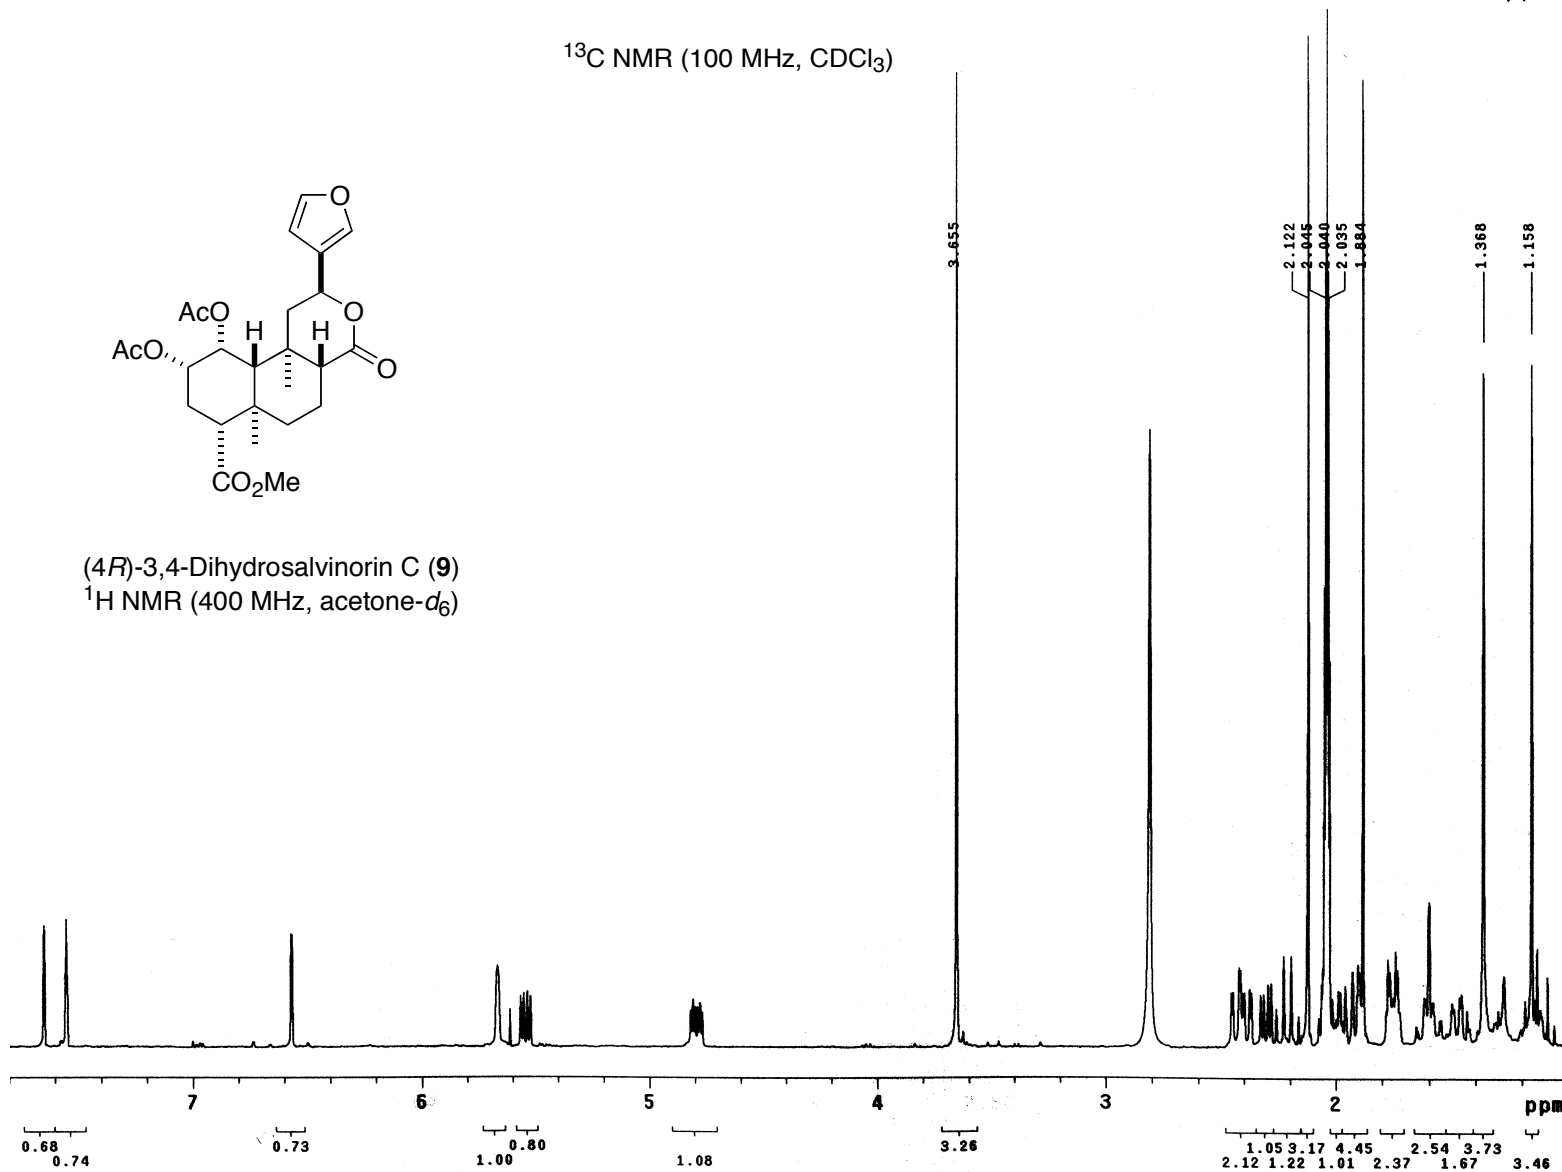

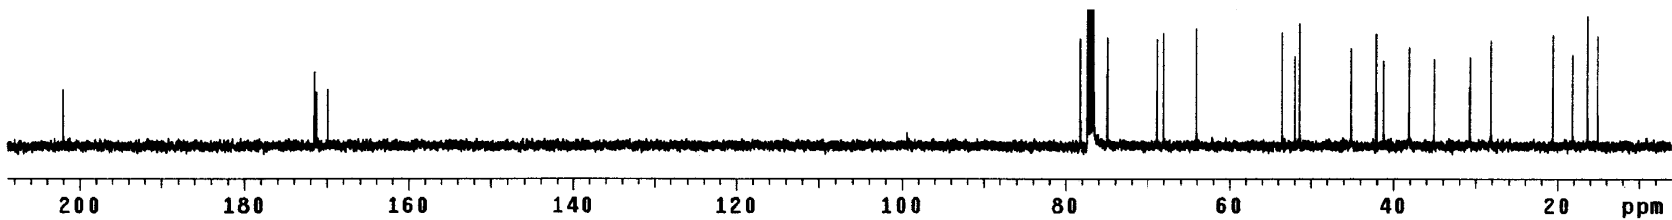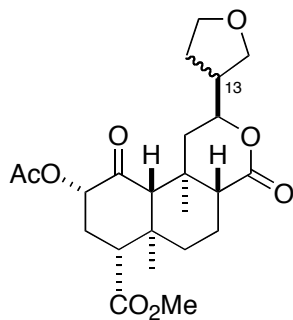

13,14,15,16-Tetrahydrosalvinorin A (**10**)  
(single epimer - C-13 configuration unknown)  
 $^1\text{H}$  NMR (400 MHz,  $\text{CDCl}_3$ )

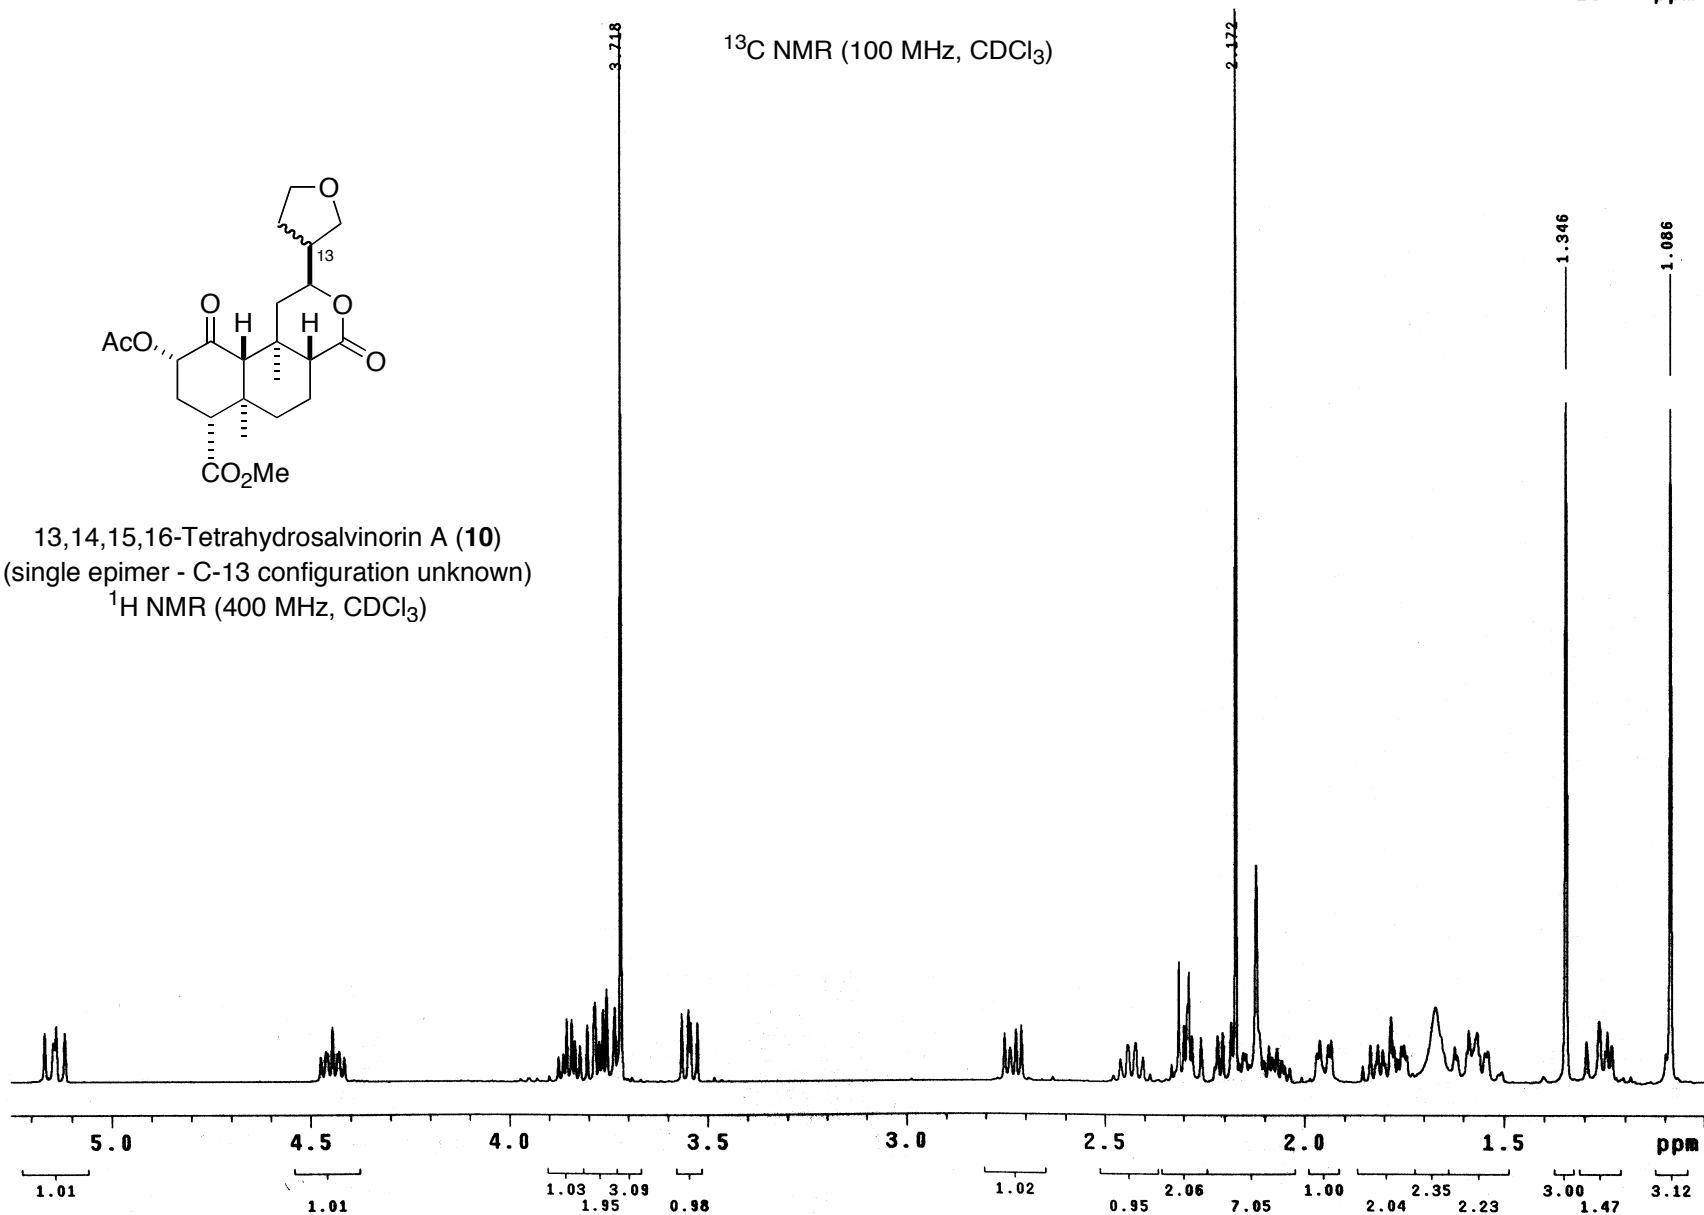

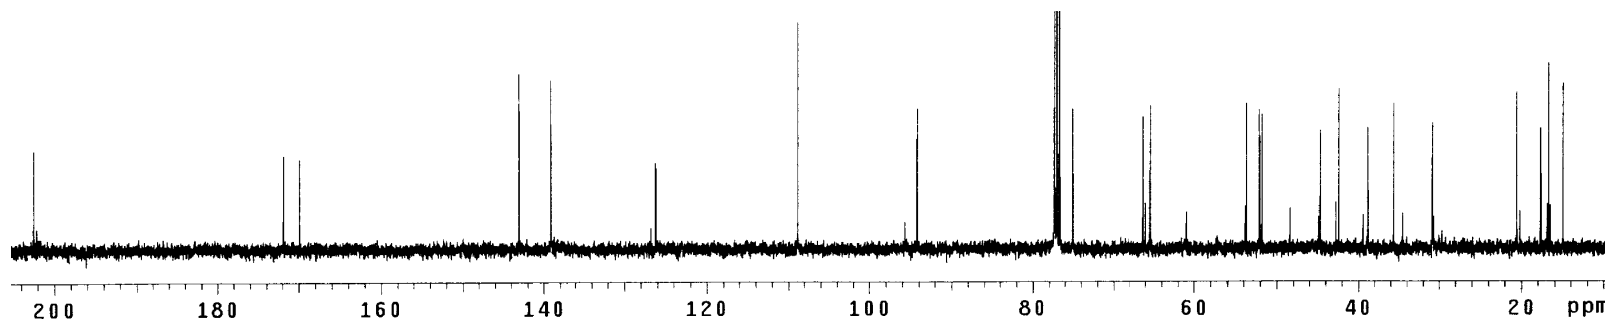

<sup>13</sup>C NMR (100 MHz, CDCl<sub>3</sub>)

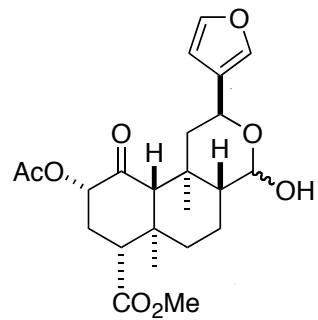

Salvinorin A lactol (11)  
<sup>1</sup>H NMR (400 MHz, CDCl<sub>3</sub>)

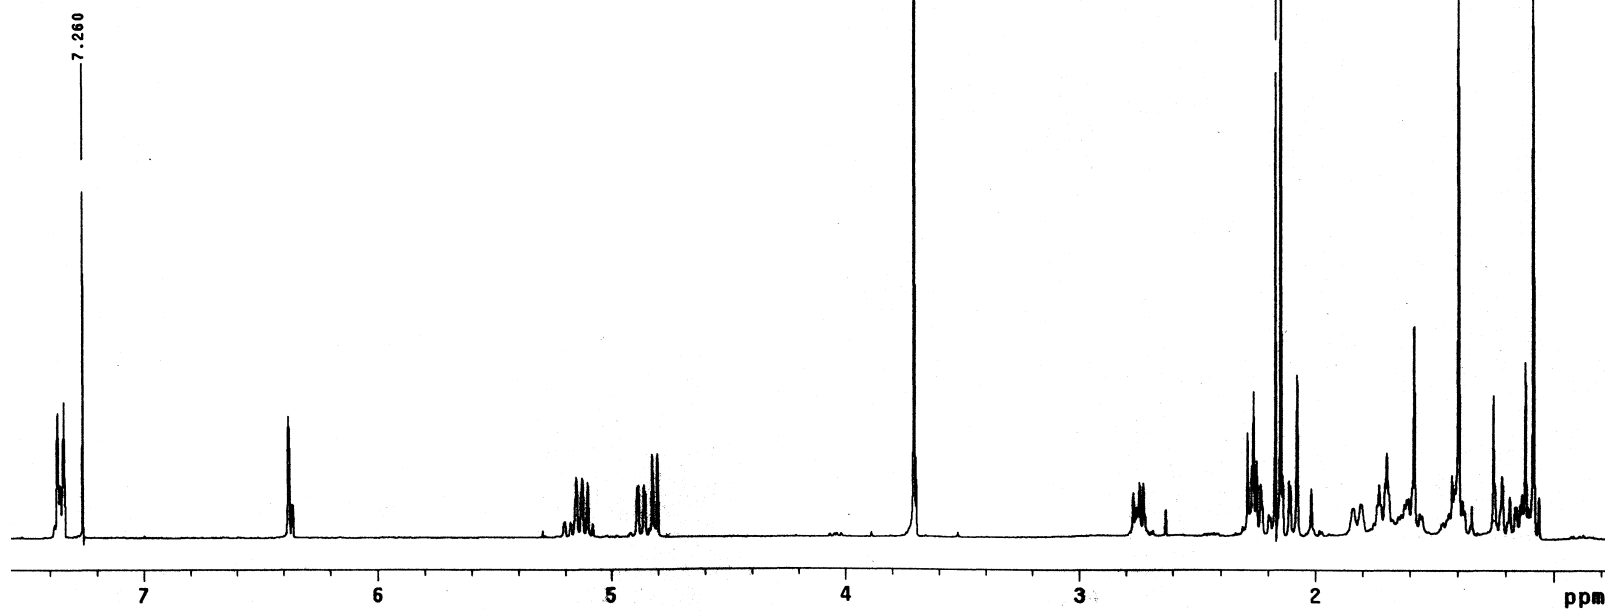

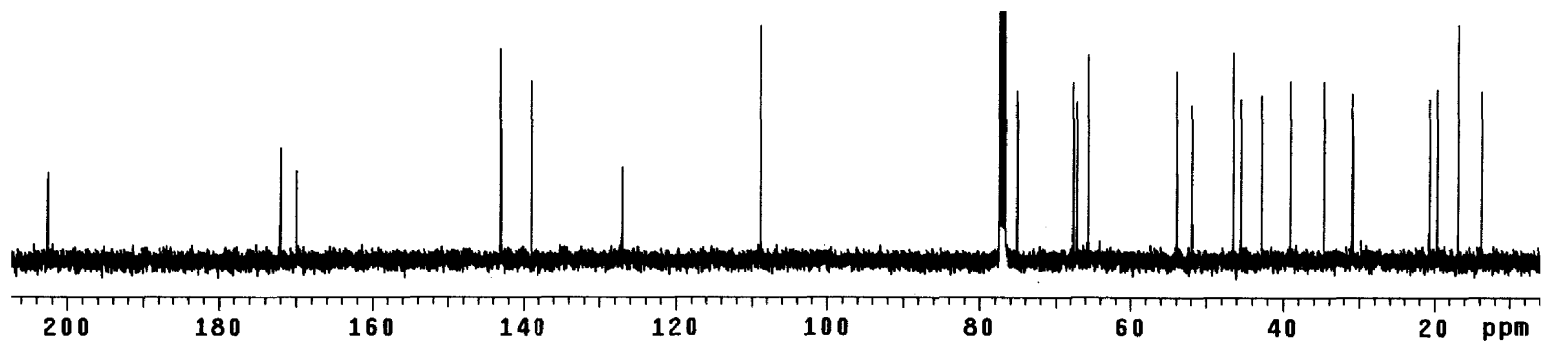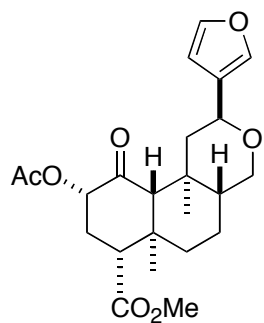

17-Deoxysalvinorin A (12)  
<sup>1</sup>H NMR (400 MHz, CDCl<sub>3</sub>)

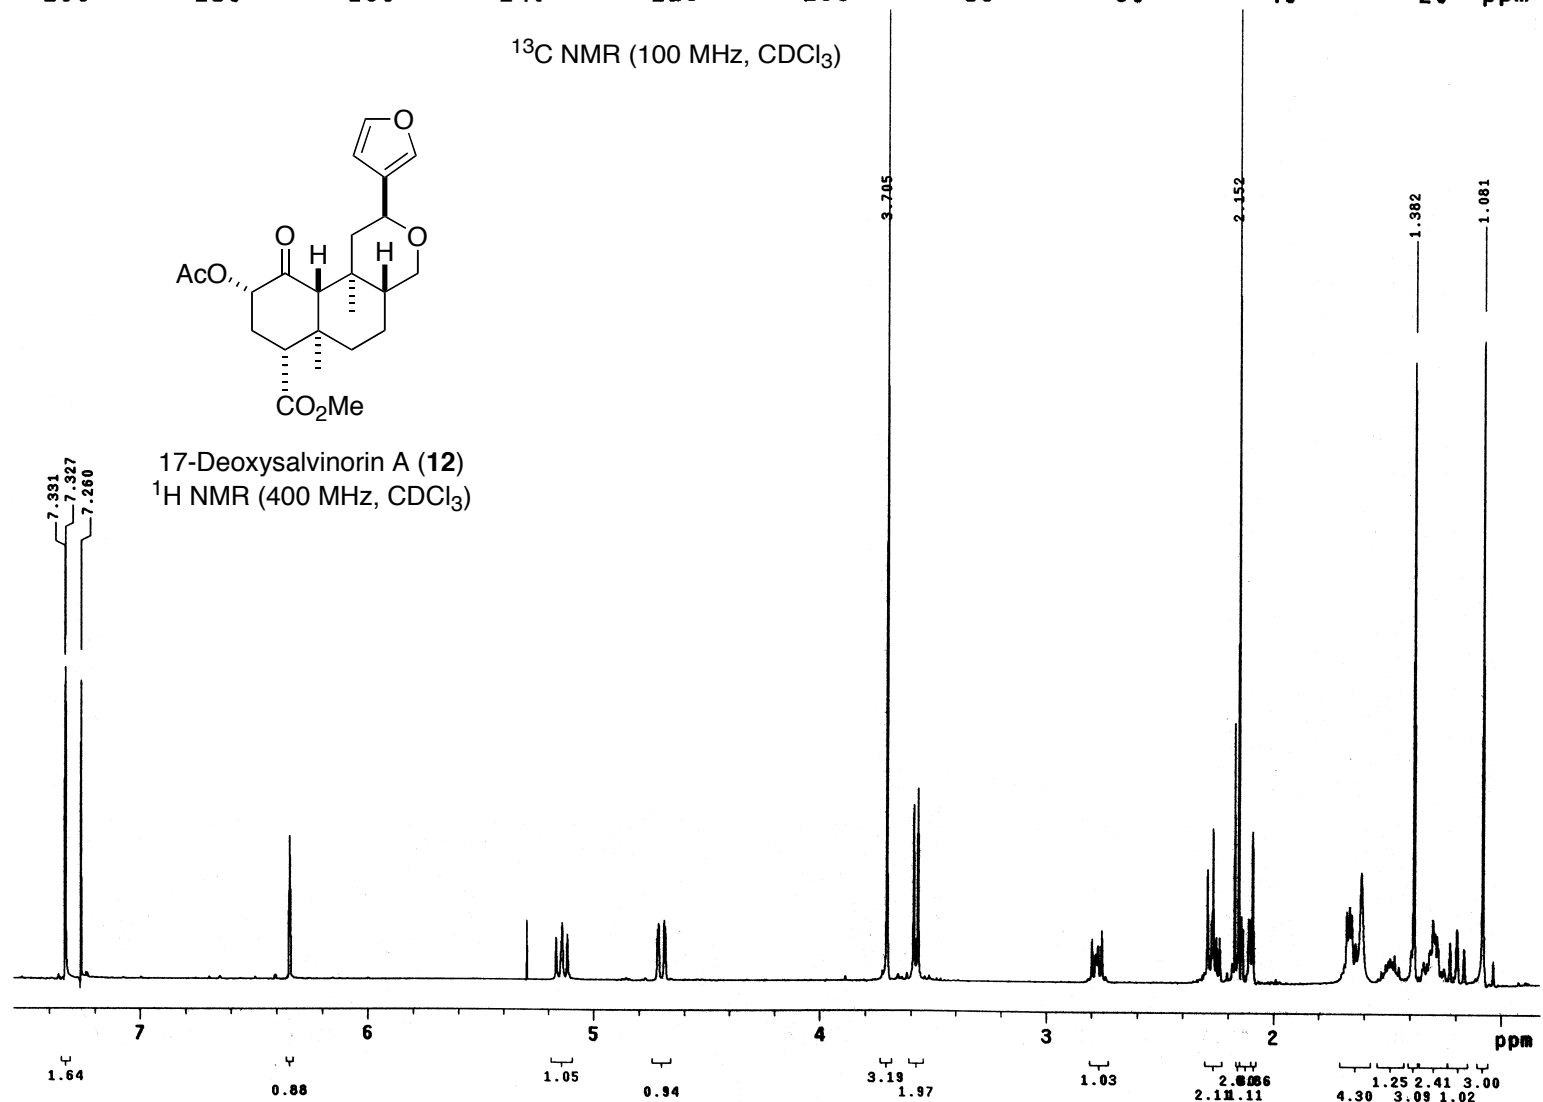



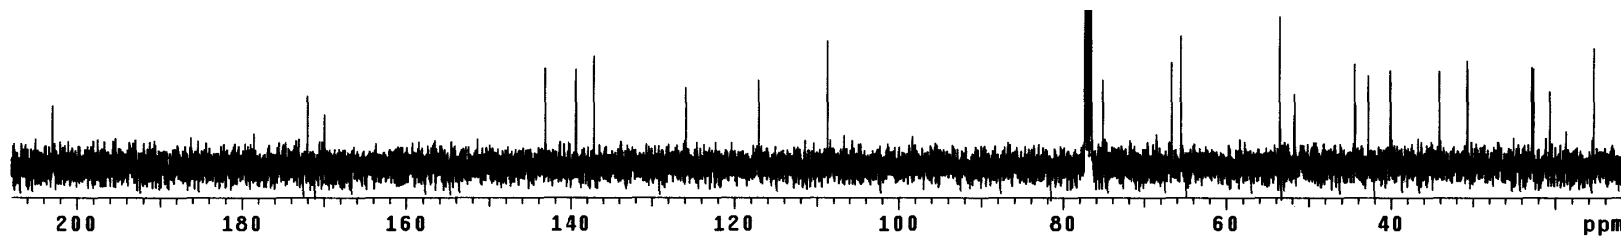

$^{13}\text{C}$  NMR (100 MHz,  $\text{CDCl}_3$ )

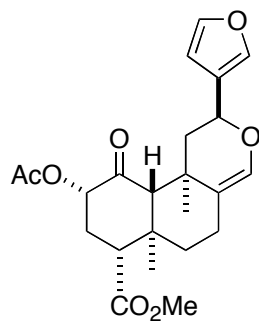

8,17-Didehydro-17-deoxysalvinorin A (**13**)

$^1\text{H}$  NMR (400 MHz,  $\text{CDCl}_3$ )

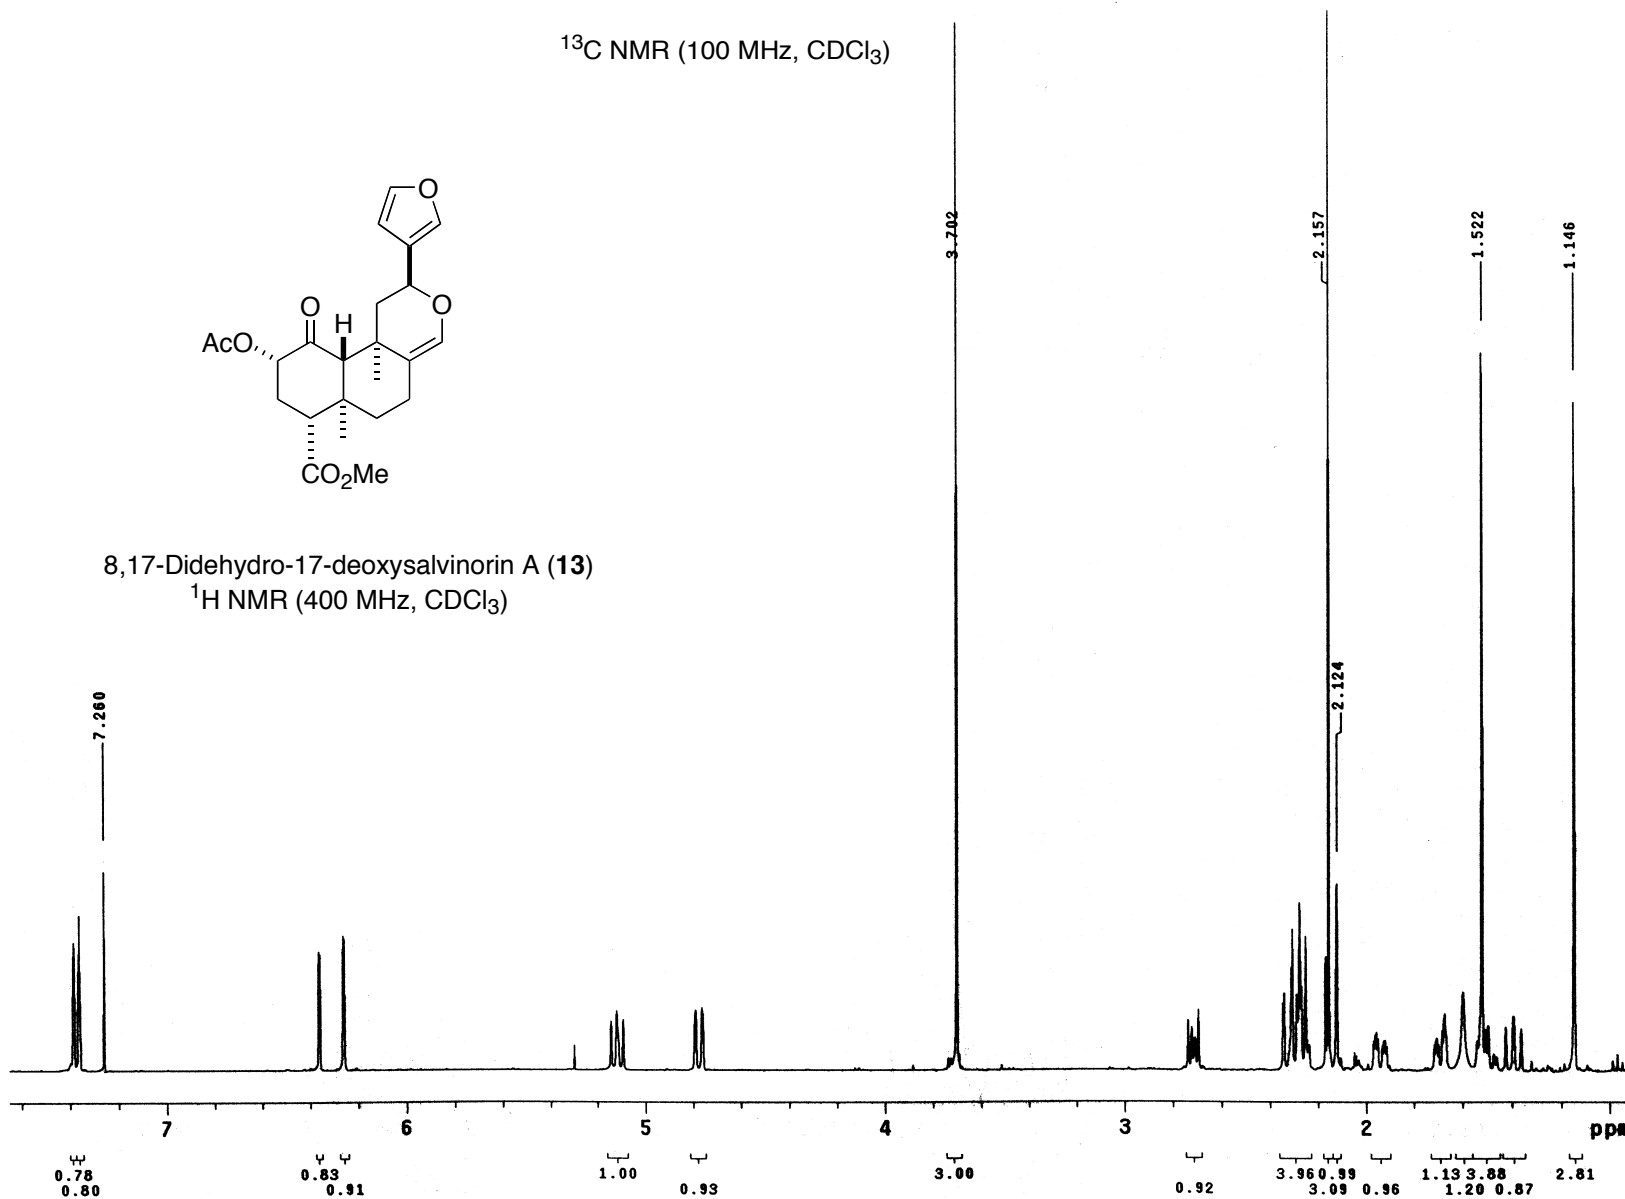

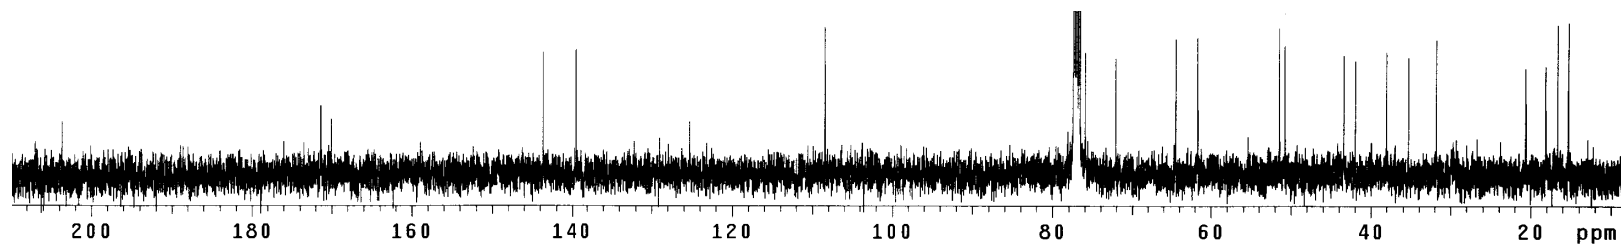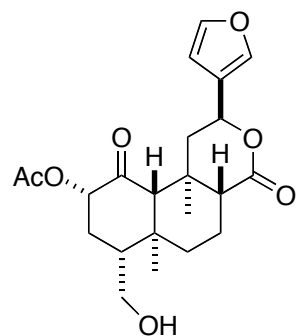

*O*-Demethyl-18-deoxysalvinorin A (15)  
 $^1\text{H}$  NMR (400 MHz,  $\text{CDCl}_3$ )

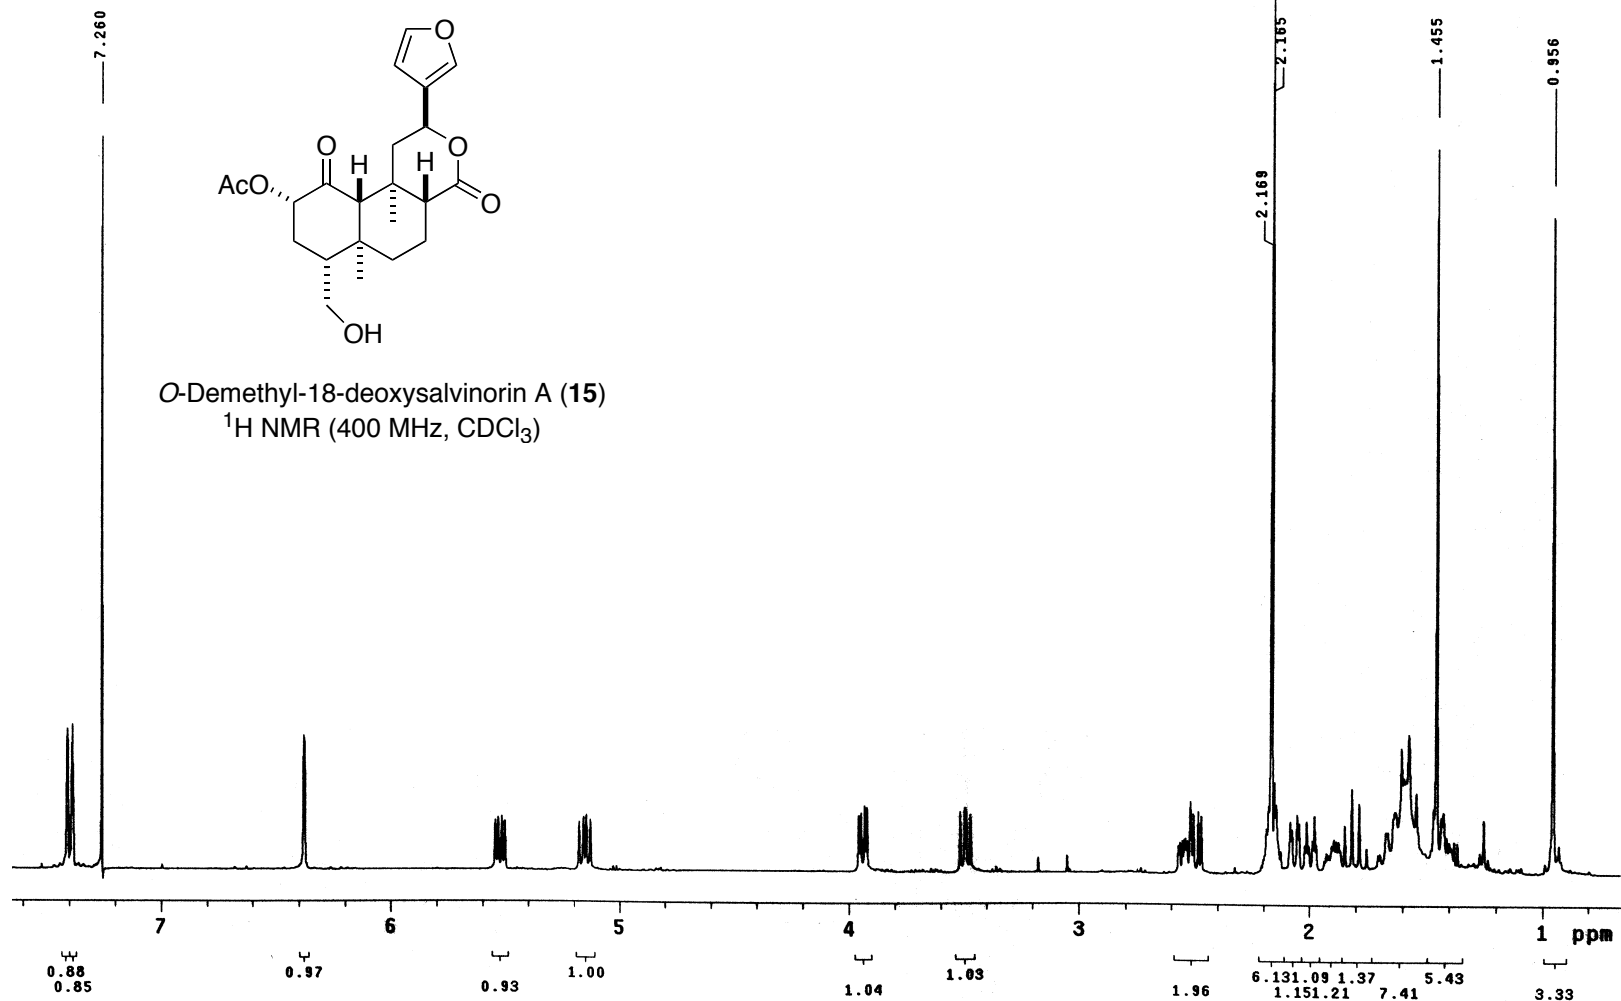

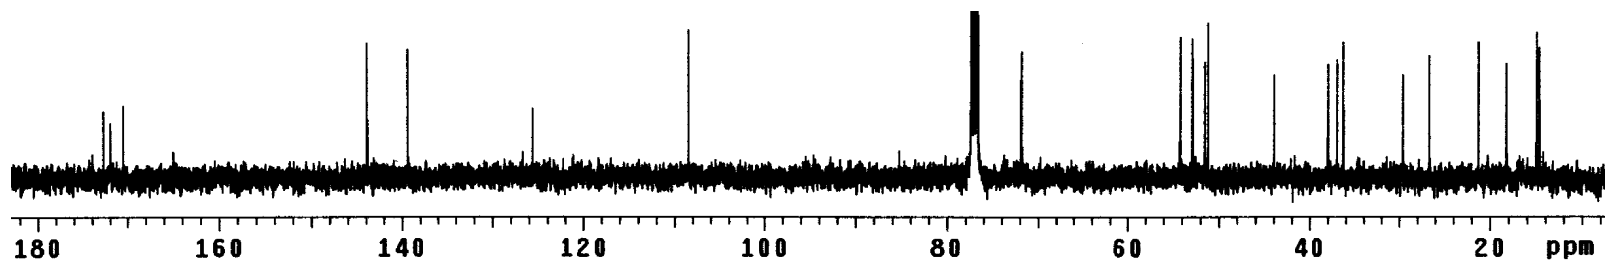

$^{13}\text{C}$  NMR (100 MHz,  $\text{CDCl}_3$ )

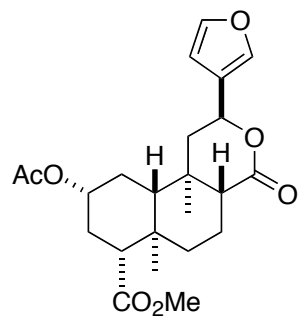

1-Deoxysalvinorin A (**18**)  
 $^1\text{H}$  NMR (400 MHz,  $\text{CDCl}_3$ )

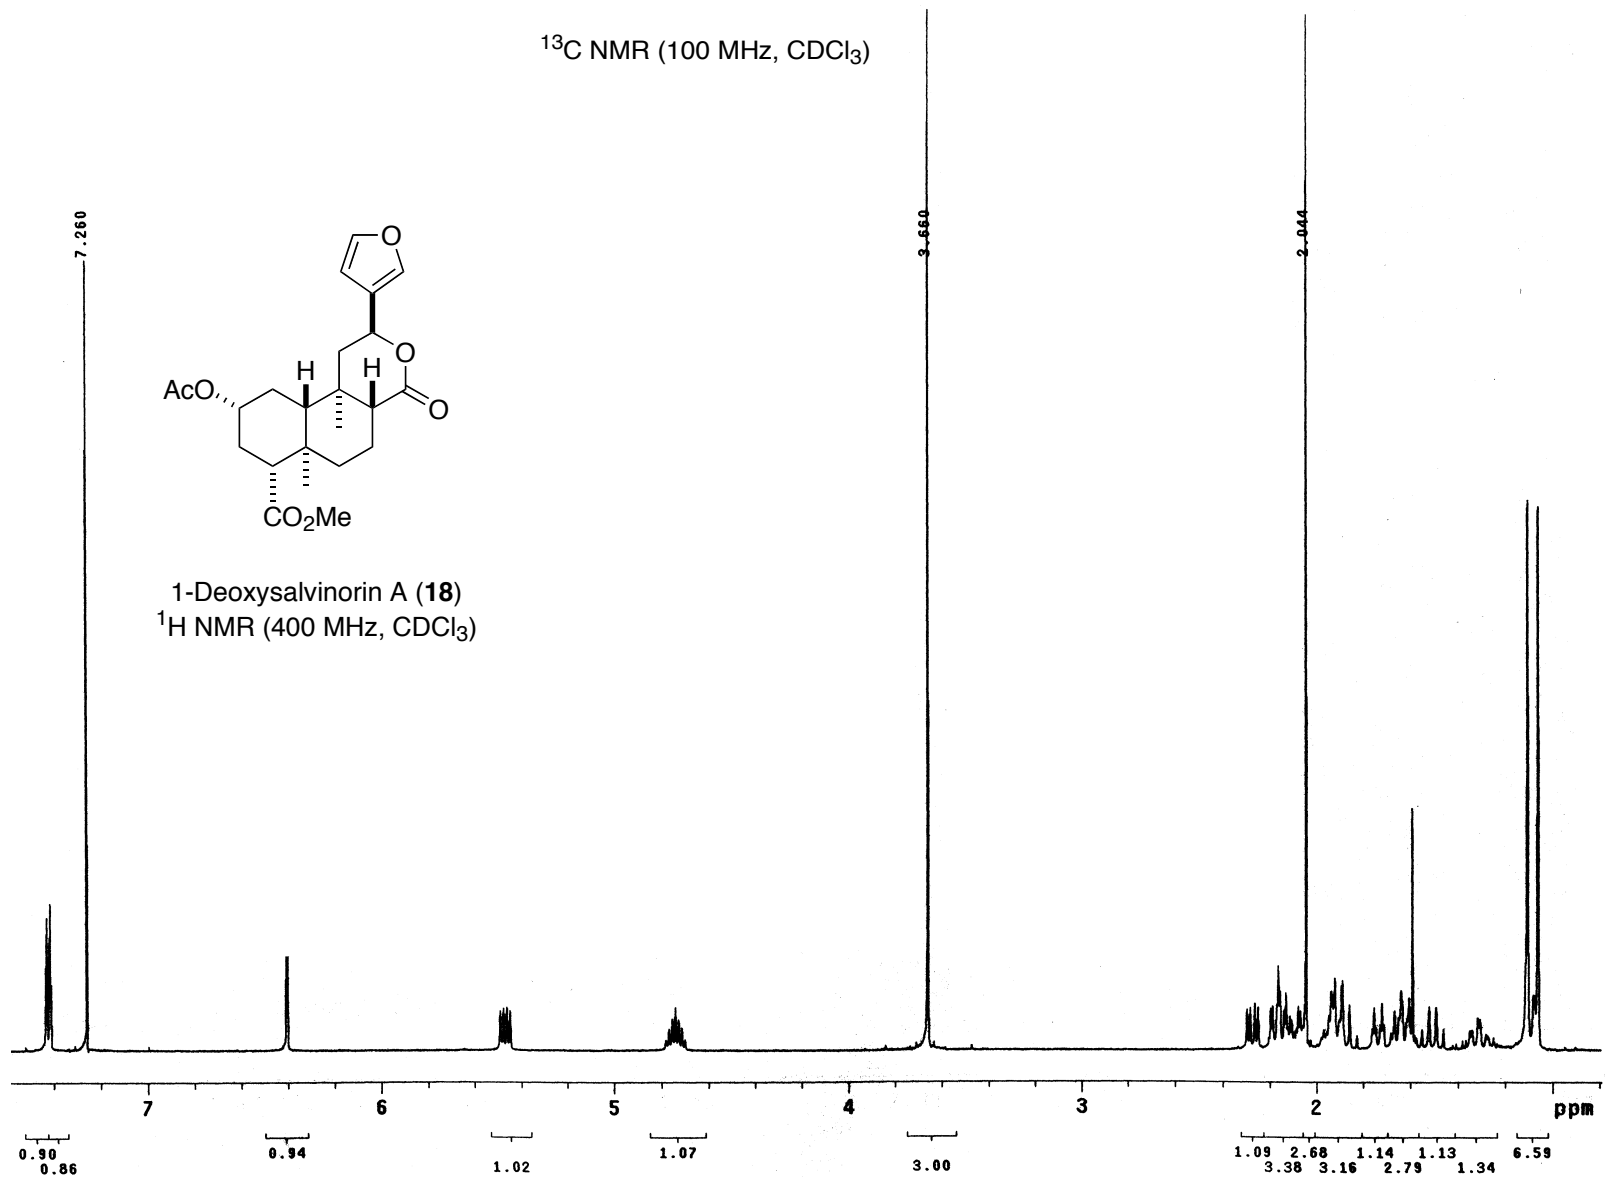

Supplement: Supplementary file 1 [file 5140870]
